# Supplementary material for: Engineered dynamic configuration of nanopores to access enhanced diffusion and selectivity for aliphatic isomers
Source: Research Square preprint supplement (doi:10.21203/rs.3.rs-7487842/v1), 2025-09-29
Supplement: Supplementary file 1 [file 5674199a550446cfd74d362a.docx]

Supplementary Information

Engineered dynamic configuration of nanopores to access enhanced diffusion and selectivity for aliphatic isomers

Susmita Kundu,a Komal Jindal,a Soumya Ghosh,a Jagannath Mondal,*a Ritesh Haldar*a

Tata Institute of Fundamental Research Hyderabad, Gopanpally, Hyderabad-500046, Telangana, India

Email: [jmondal@tifrh.res.in](mailto:jmondal@tifrh.res.in); [riteshhaldar@tifrh.res.in](mailto:riteshhaldar@tifrh.res.in)

**Materials**

Cupric acetate monohydrate, bicycle-2,2,2-octanedicarboxylic acid (Bicyclo), 1,4-benzenedicarboxylic acid (BDC), anhydrous 2,2-dimethylbutane (2,2 DMB), 2,3-dimethylbutane (2,3 DMB), benzene, cyclohexane, hexane, and DMF were purchased from Sigma-Aldrich. Copper nitrate hexahydrate was purchased from SRL. Every chemical was used as supplied, without any additional purification. OpenQCM supplied the QCM sensors (5MHz).


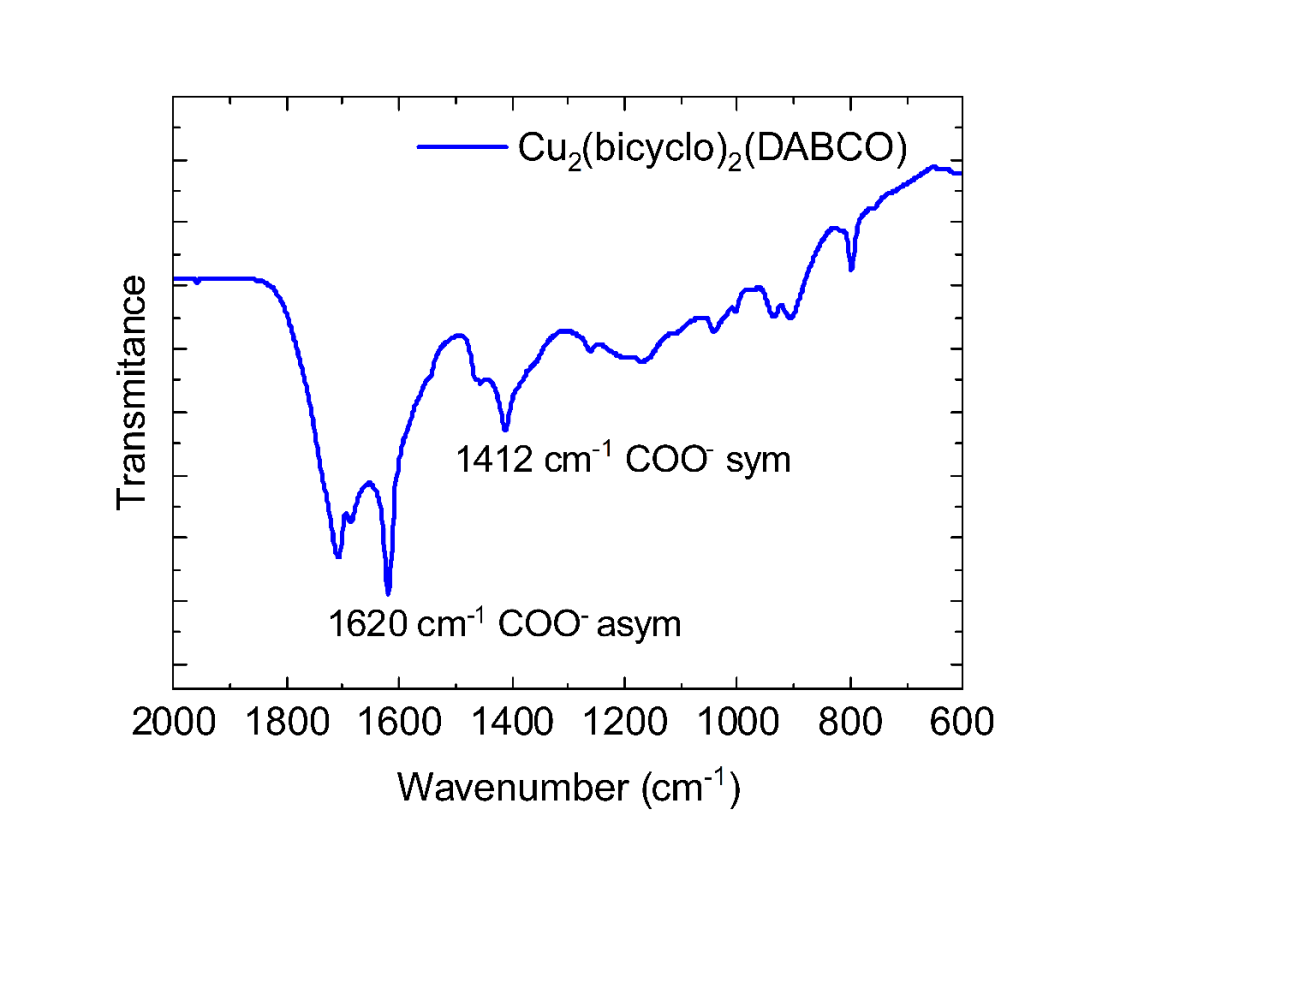


Supplementary Fig. 1| IRRA spectra of Cu2(bicyclo)2(DABCO) oriented thin film. Symmetric and asymmetric stretching frequencies of the carboxylate group are marked.

Supplementary Fig. 2| Fractional mass uptake profile of Cu2(bicyclo)2(DABCO) thin film (on QCM) for 2,2 DMB (blue) and 2,2 DMB (Green) molecules with a linear fit in the lower mass uptake region.


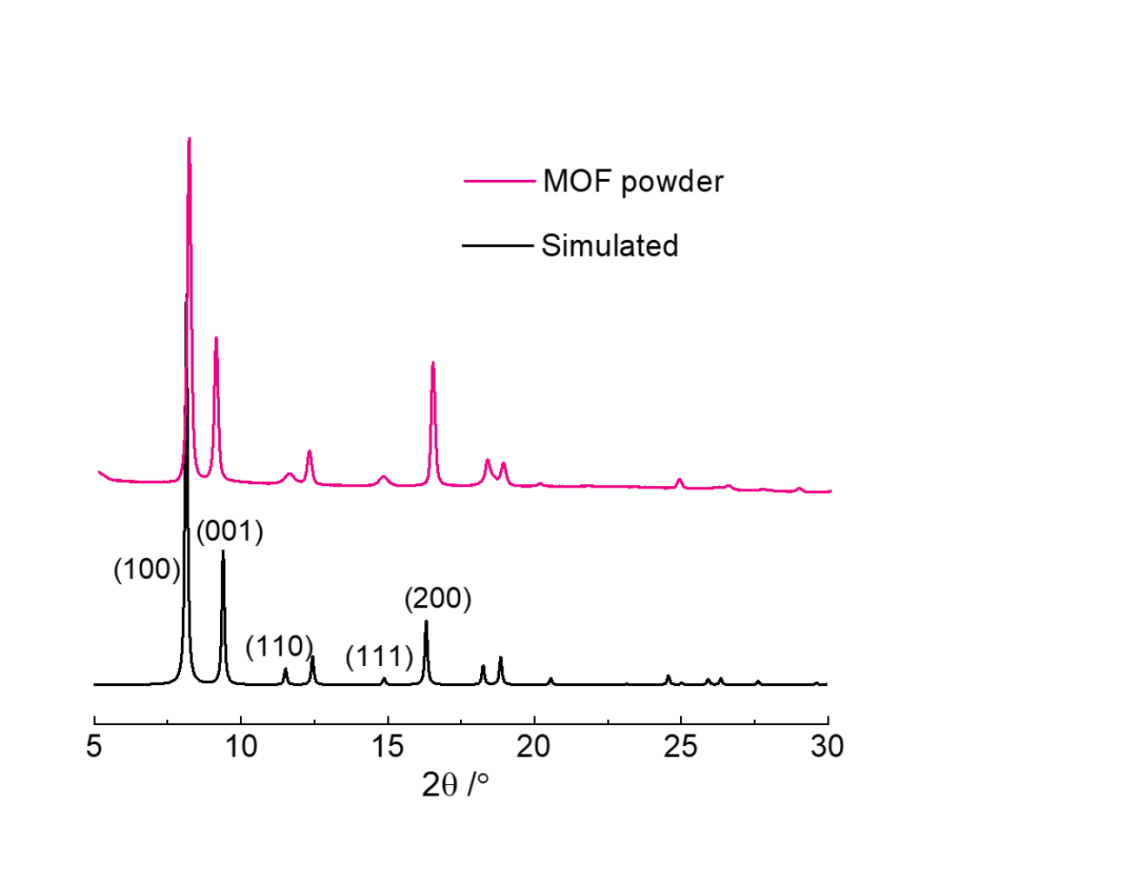


Supplementary Fig.3| PXRD pattern of Cu2(bicyclo)2(DABCO) powder (red) compared with the Cu2(bicyclo)2(DABCO) simulated pattern (black).


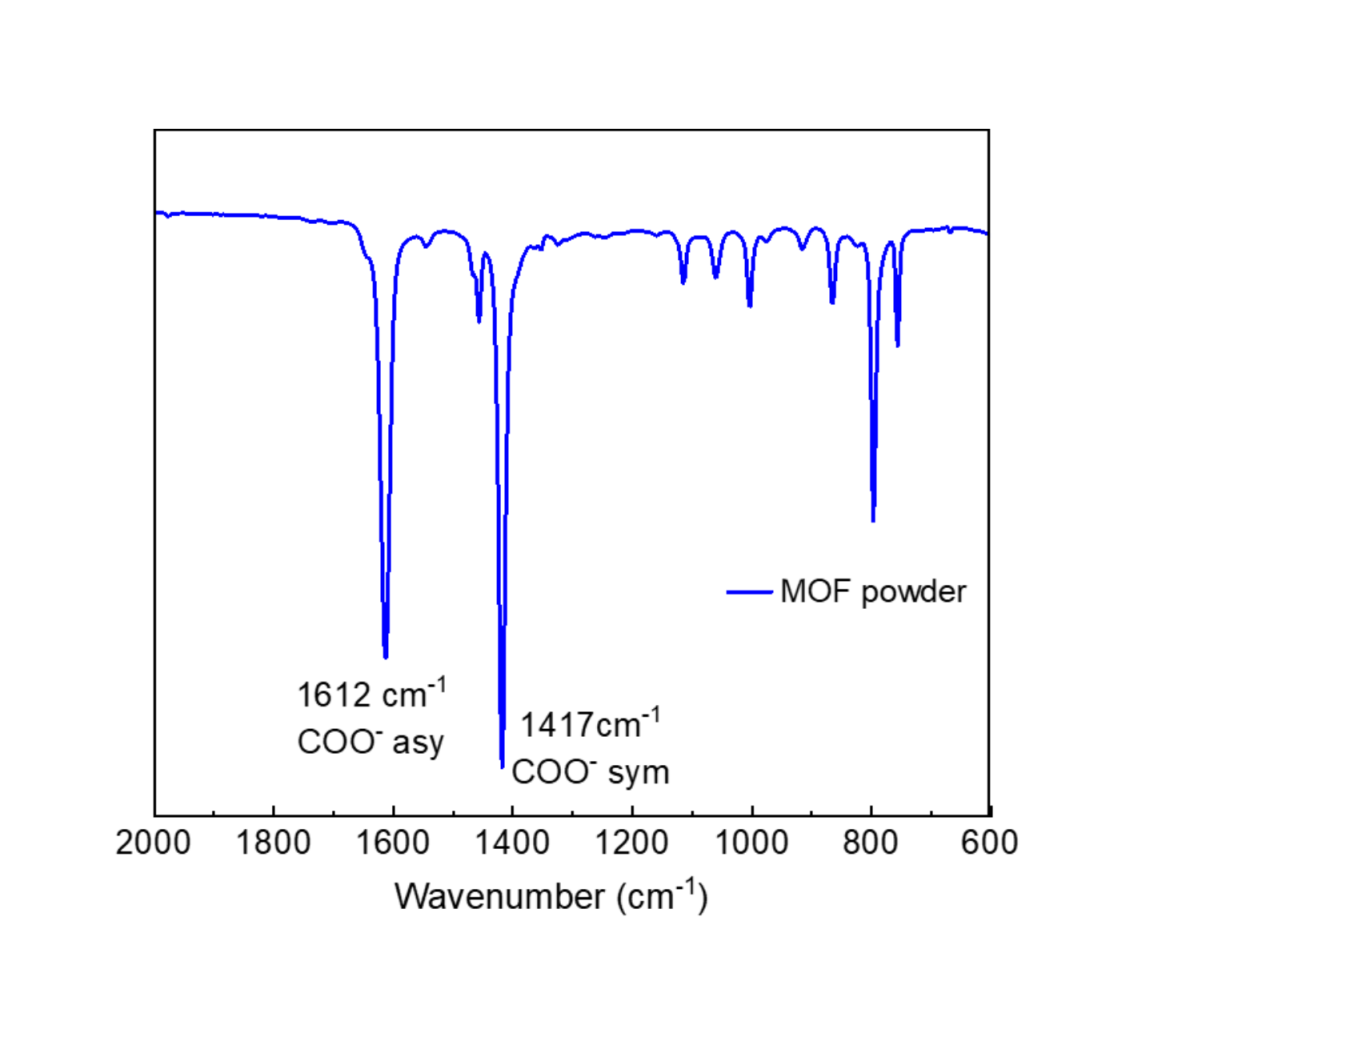


Supplementary Fig. 4| IR spectrum of Cu2(bicyclo)2(DABCO) MOF powder. The symmetric and asymmetric stretching frequencies of the carboxylate group are mentioned in the spectrum.


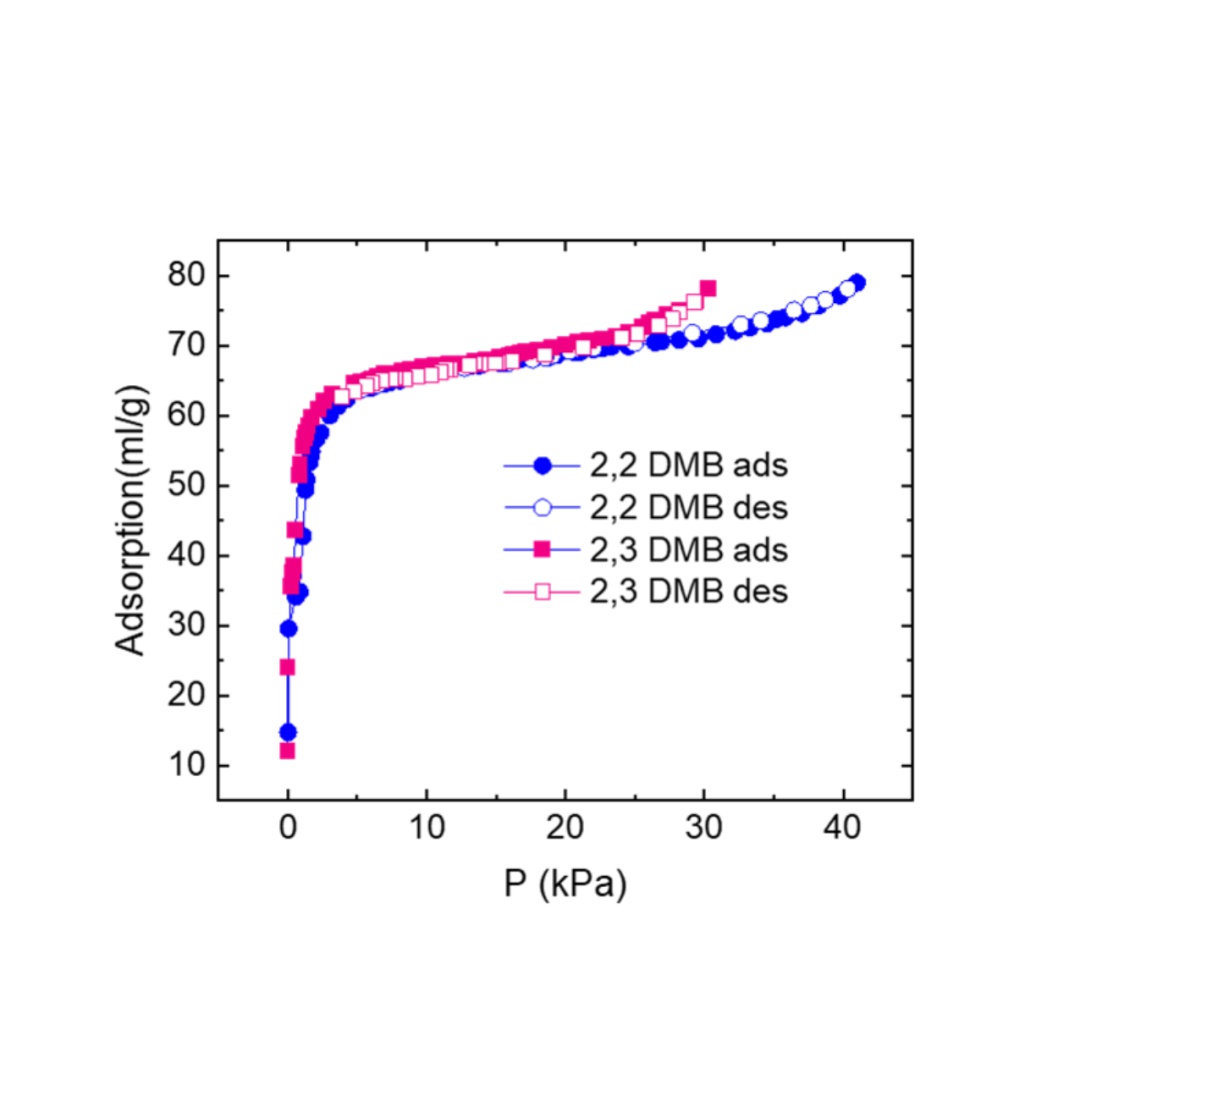


Supplementary Fig. 5| Adsorption isotherms of 2,2 DMB (blue filled circle = adsorption, blue empty circle = desorption) and 2,3 DMB (Red filled square = adsorption, red empty square = desorption) molecules for Cu2(bicyclo)2(DABCO) MOF powder at 298 K.


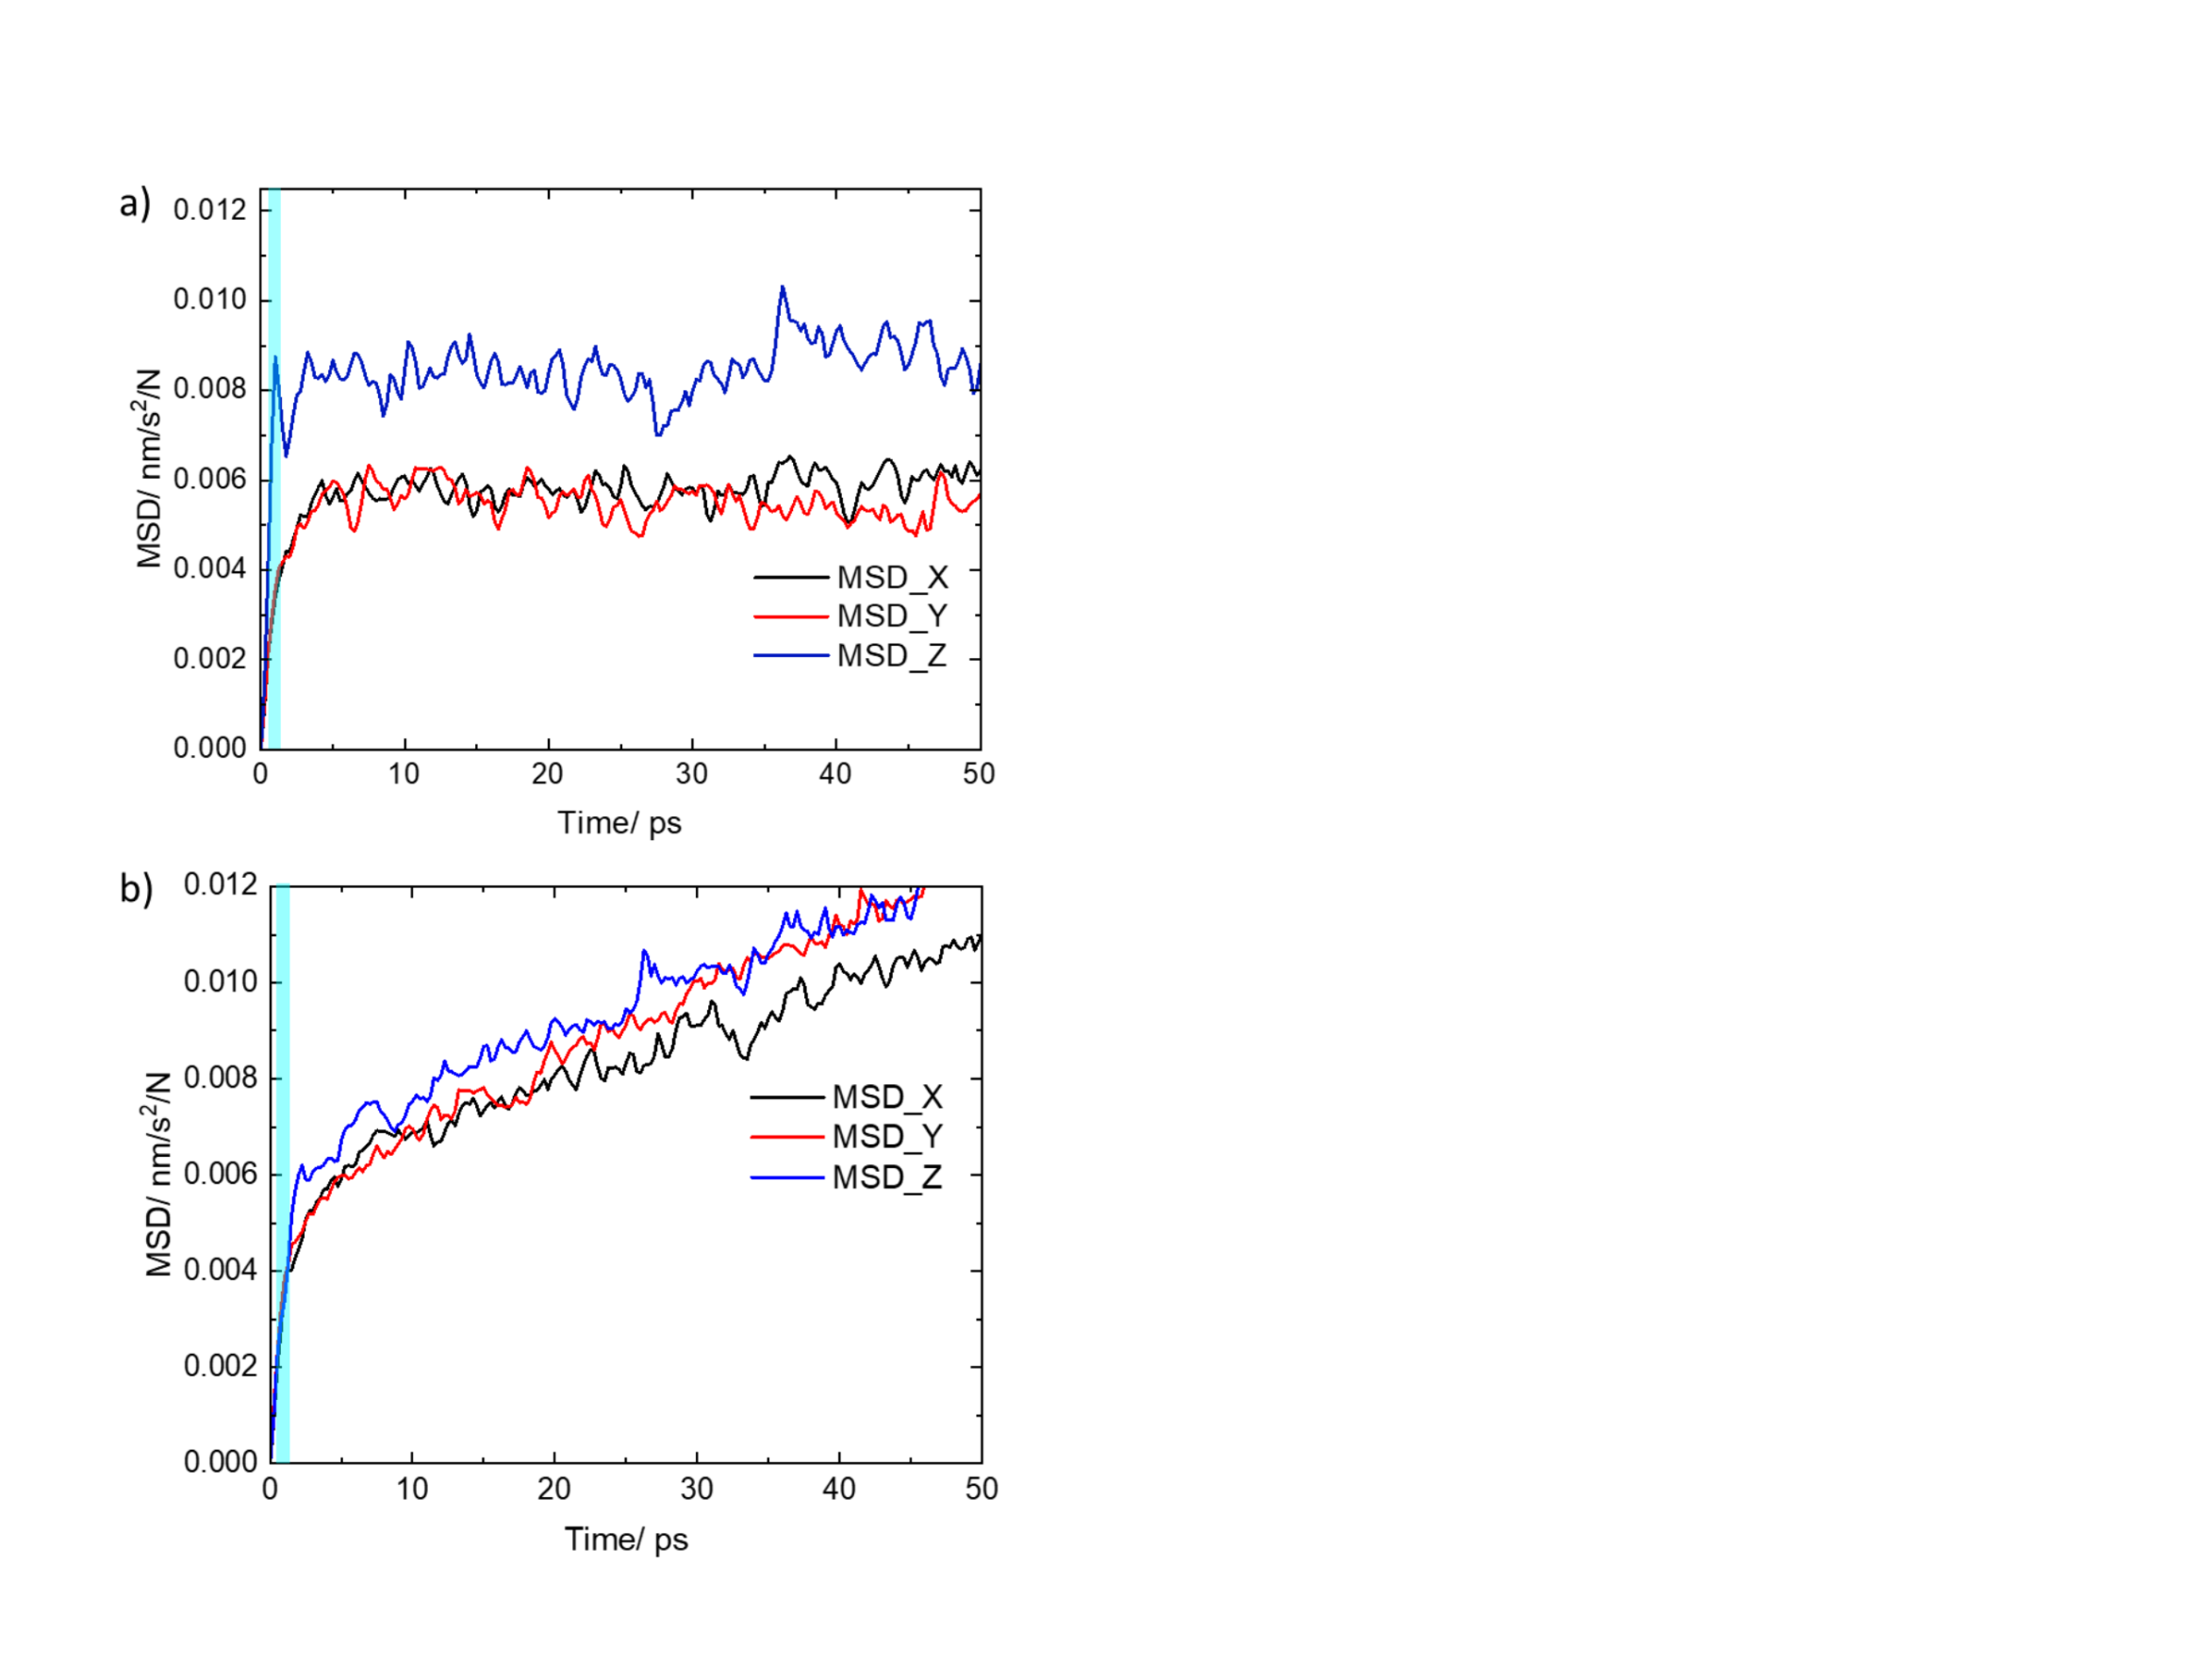


Supplementary Fig. 6| Mean Squared Displacement (MSD) plots for a) 2,2 DMB (2,2-dimethylbutane) and b) 2,3 DMB (2,3-dimethylbutane) in Cu2(bicyclo)2DABCO along [010],[100], and [001] planes.


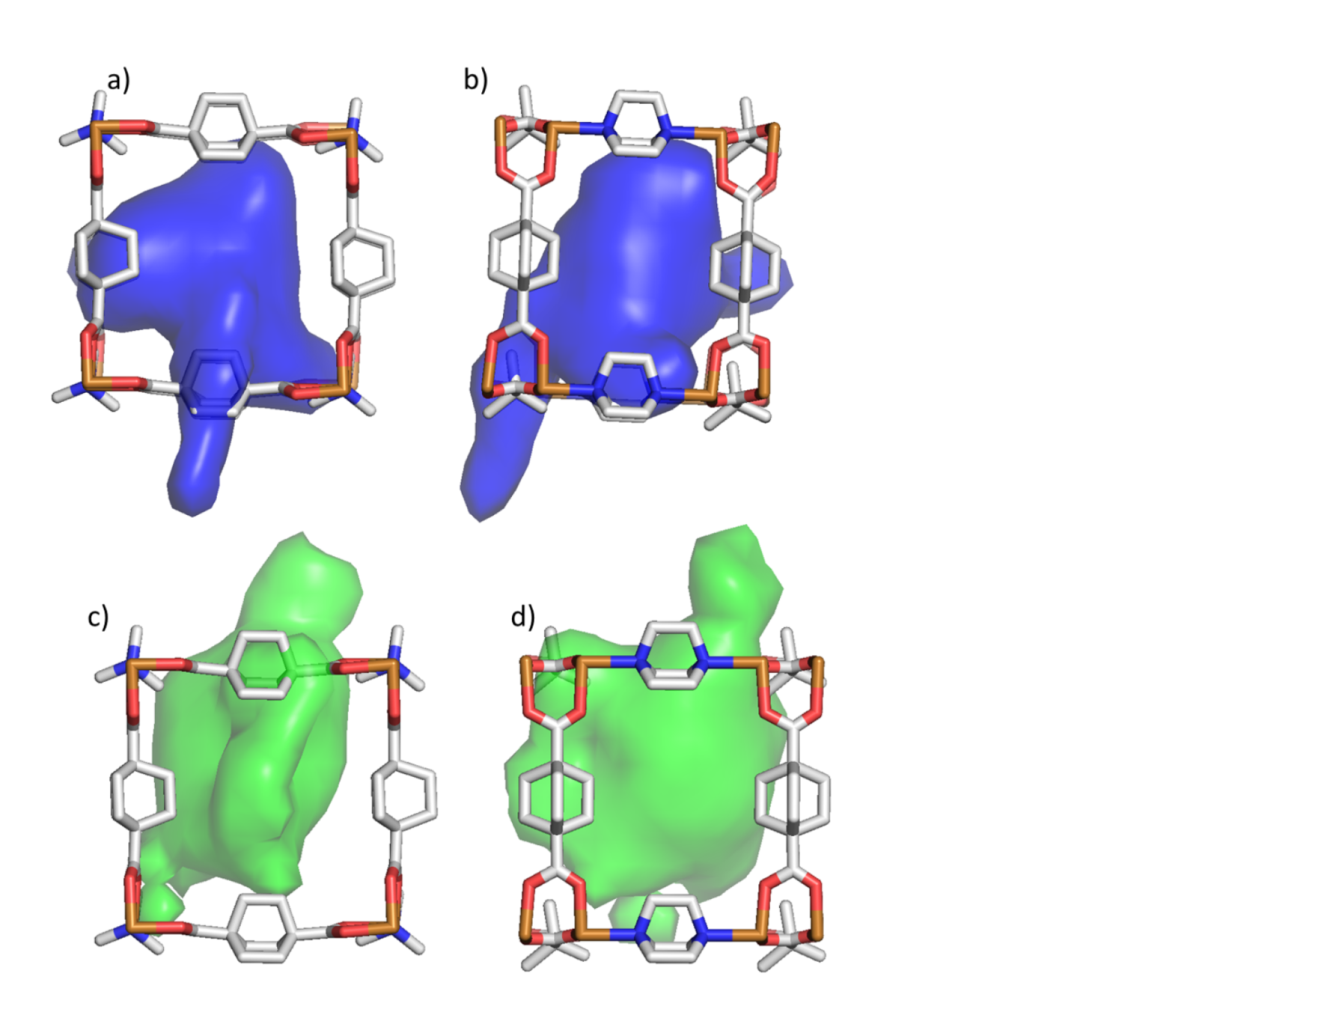


Supplementary Fig. 7| Isosurface plot for density of 2,2 DMB Cu2(bicyclo)2Dabco MOF a) along [100] and b) [001] plane. Isosurface plot for density of 2,3 DMB in Cu2(bicyclo)2Dabco MOF, c) along [100] and d) [001] plane.

Supplementary Fig. 8| Isosurface (0.05 a.u) view of the 2,2 DMB (a) and 2,3 DMB (b) diffusion in Cu2(bicyclo)2(DABCO) simulated using AIMD (for 50 ps).

Supplementary Fig. 9| Radial distribution functions (RDF) plots a) 2,2 DMB with bicyclo and DABCO, b) 2,3 DMB with bicyclo and DABCO, c) both the isomers with 2,2 DMB with bicyclo and DABCO, d) head and tail part of 2,2 DMB with bicyclo and DABCO.

To distinguish the interaction sites of the isomers, radial distribution functions (RDF) were plotted for 2,2 DMB and 2,3 DMB (all C atoms of the molecule) with respect to DABCO (all C and N atoms of the molecule) and bicyclo (all C atoms, excluding COO) (Fig. S9). RDF plots clearly exhibits shorter range interactions between the isomers and bicyclo, compared to that of DABCO. Among the two isomers, RDF plots indicated close proximity interaction with 2,3 DMB more than the 2,2 DMB. Moreover, the bulker end of 2,2 DMB (in blue) exhibited shorter range interactions compared to the linear part (in red). This confirms that bicyclo can interact selectively with the isomers.


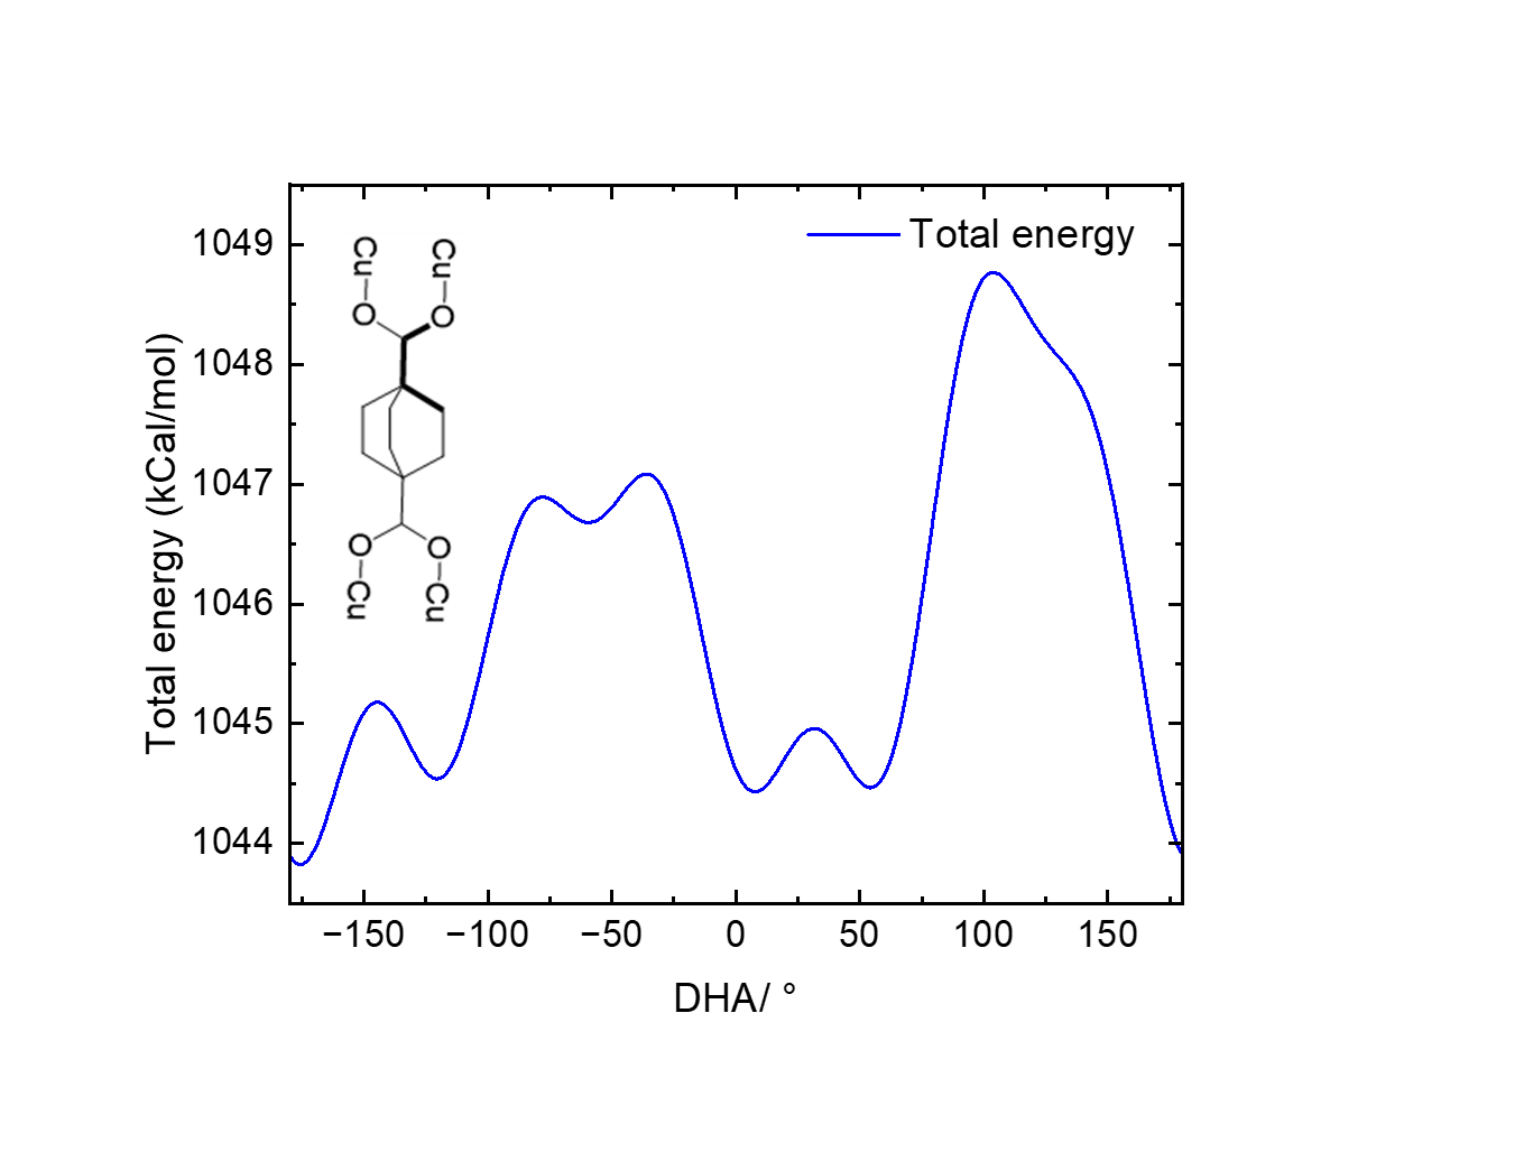


Supplementary Fig. 10| Total Energy plot of dihedral angle (Cbicyclo-C’bicyclo-Ccarboxylate-Ocarboxylate) of bicyclo linker in Cu2(bicyclo)2Dabco calculated using UFF.


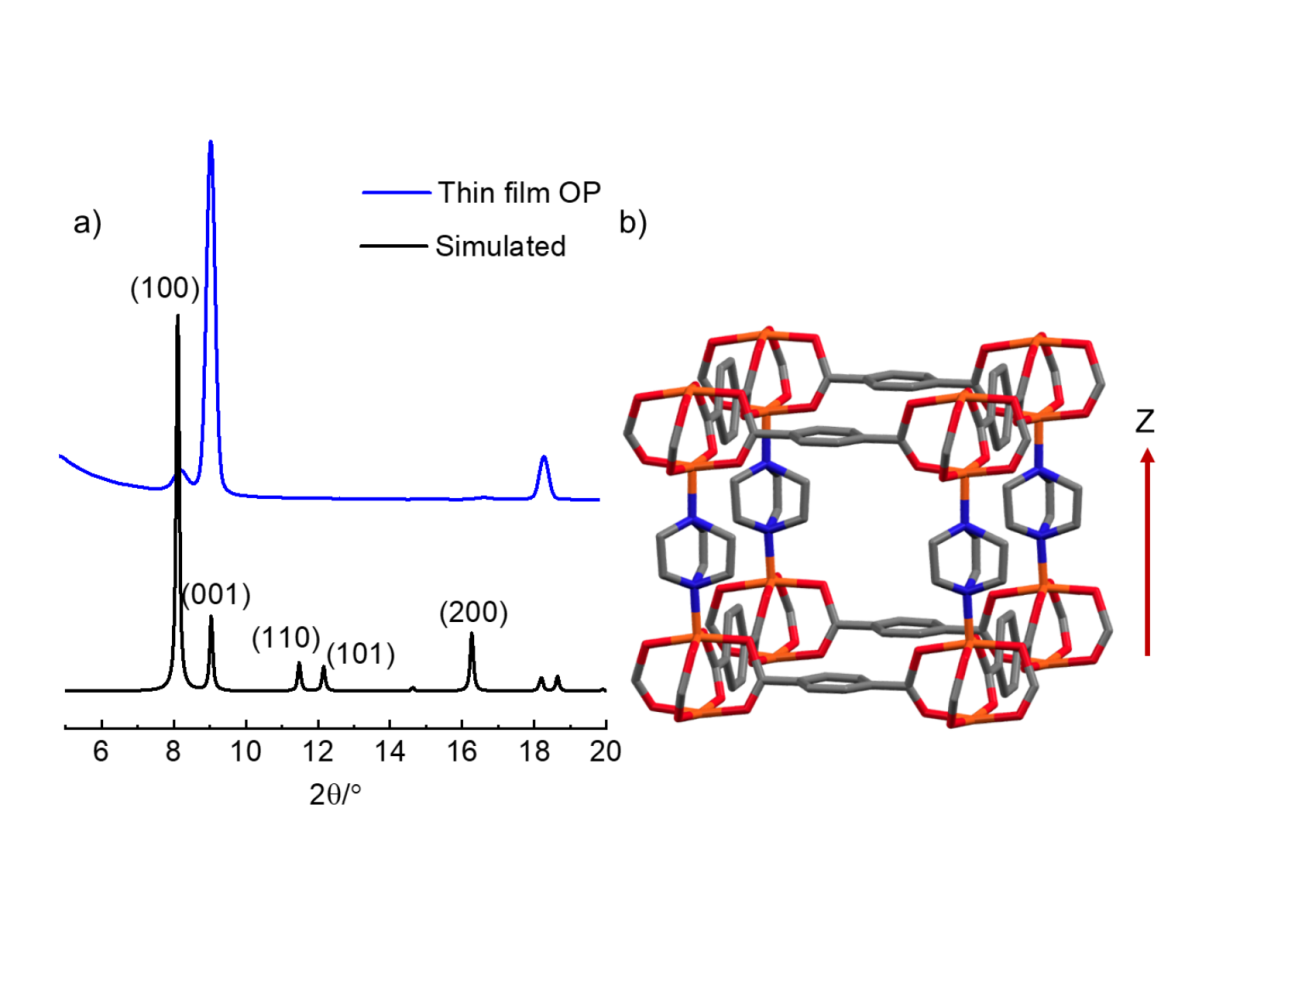


Supplementary Fig. 11| a) Out of plane (OP) XRD pattern of Cu2(bdc)2(DABCO) thin film compared with the simulated pattern, b) Structure of Cu2(bdc)2(DABCO) MOF. Thin film is grown in Z-direction where the plane containing the dicarboxylic acid faces the thin film surface.


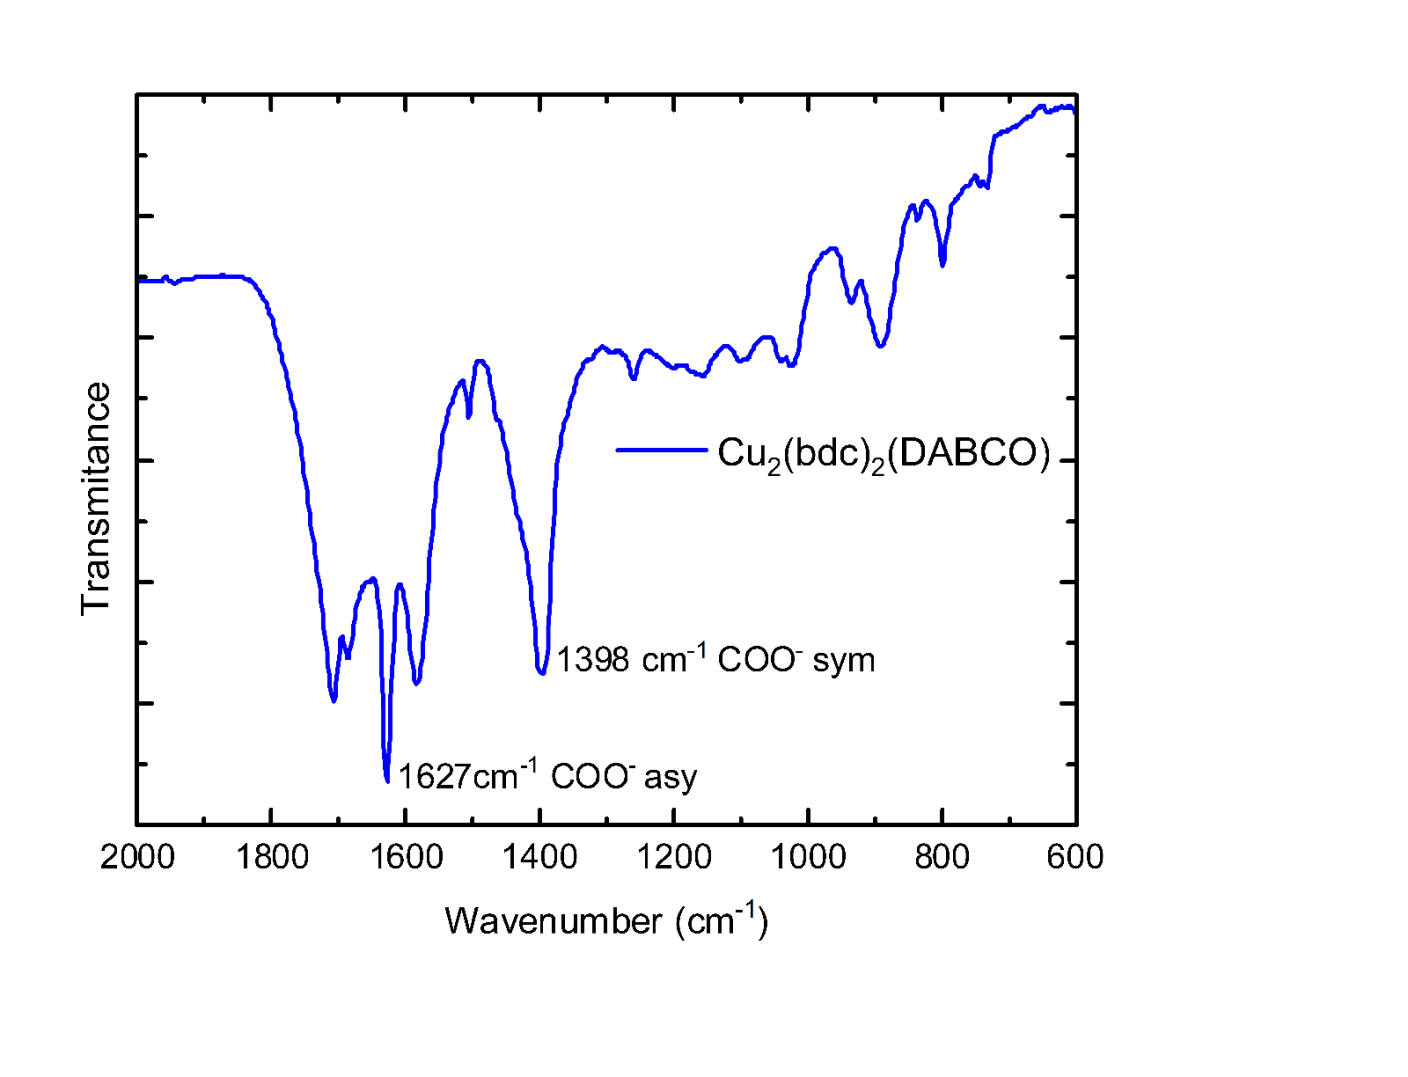


Supplementary Fig. 12| IRRA spectra of Cu2(bdc)2(DABCO) oriented thin film. Symmetric and asymmetric stretching frequencies of the carboxylate groups are pointed out in the spectrum.


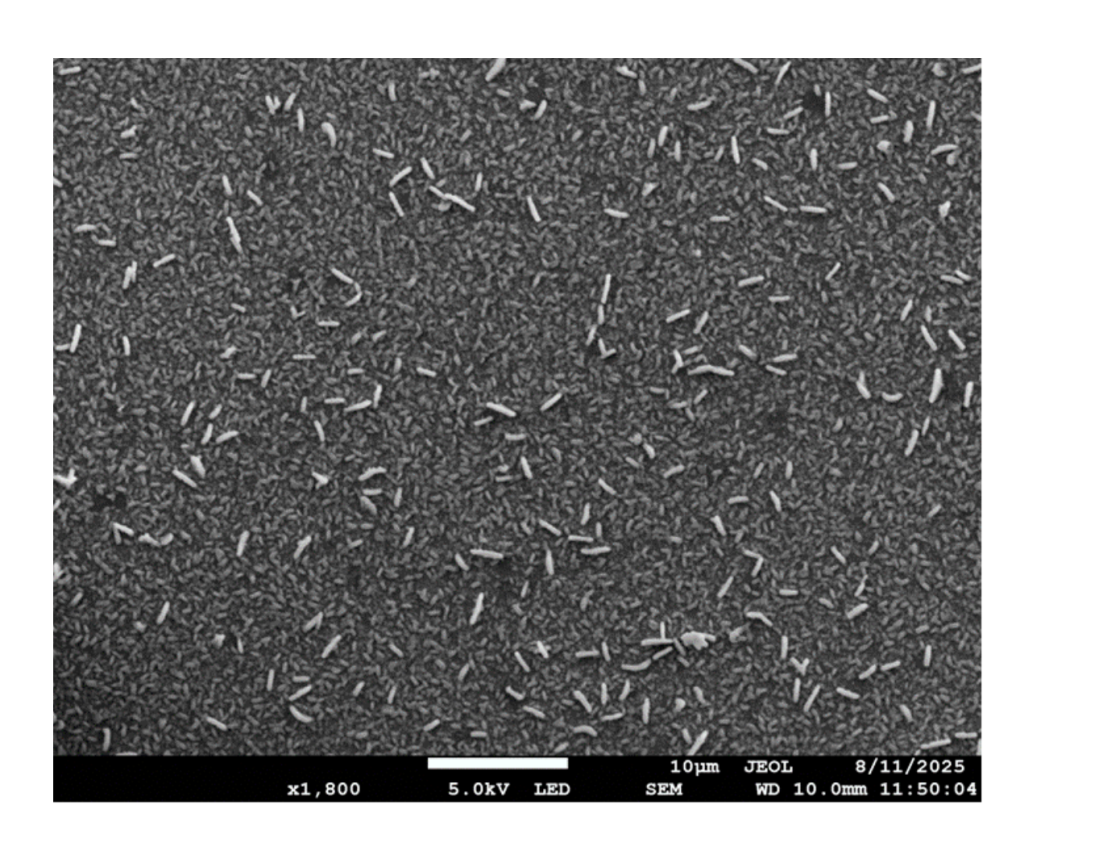


Supplementary Fig. 13| SEM image of Cu2(bdc)2(DABCO) oriented thin film indicating a full coverage in the surface.


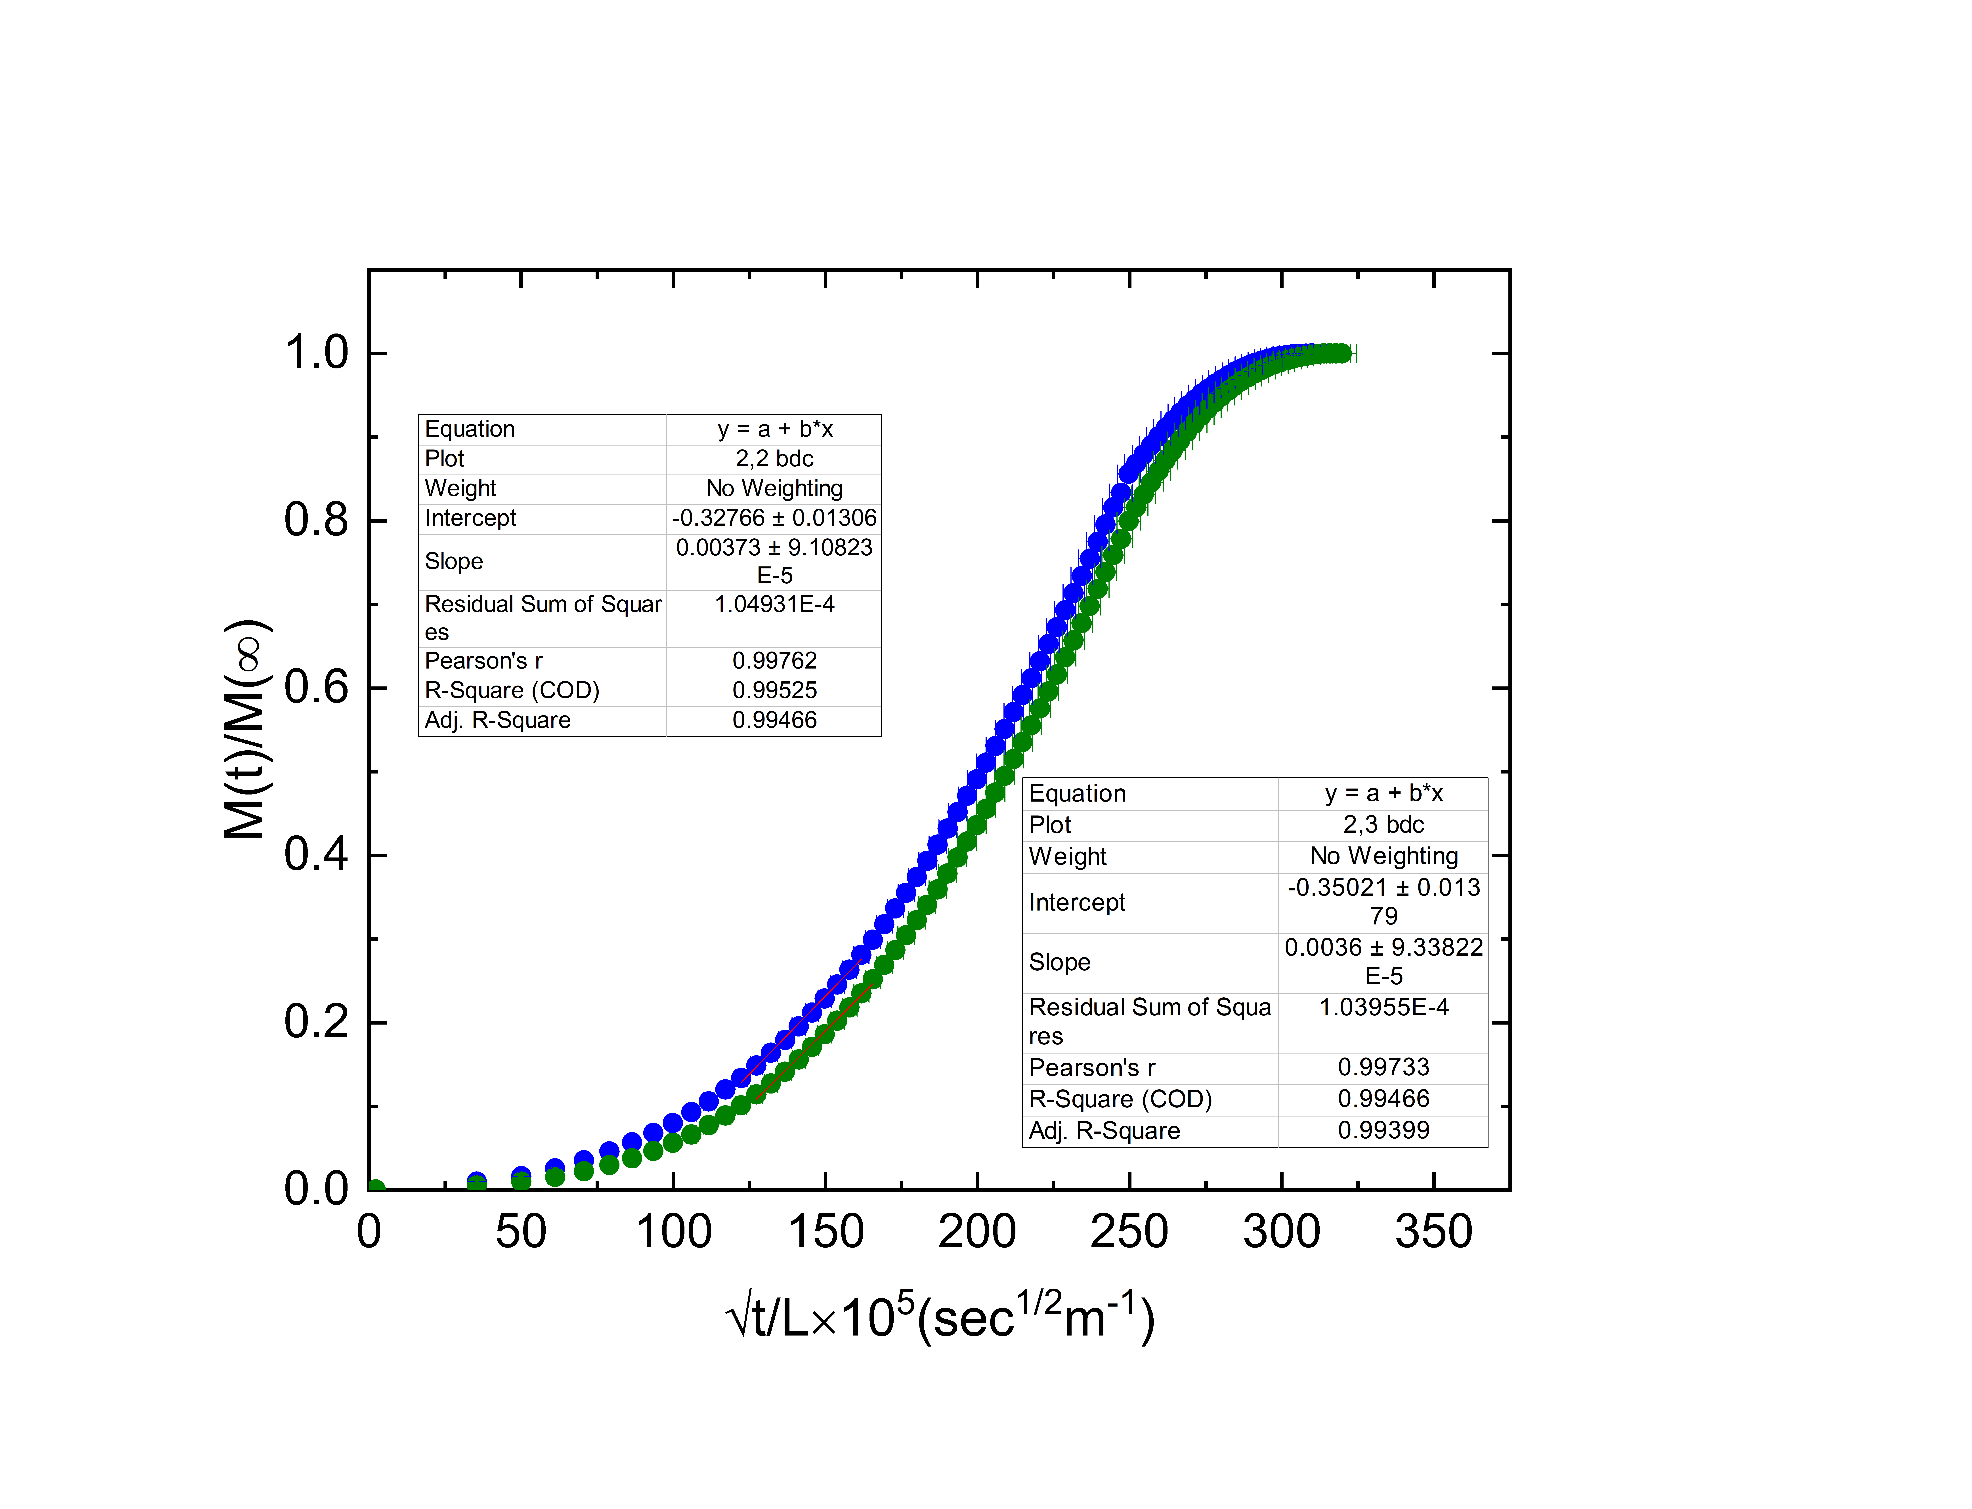


Supplementary Fig. 14| Fractional mass uptake profile of Cu2(bdc)2(DABCO) thin film (on QCM) for 2,2 DMB (blue) and 2,2 DMB (Green) molecules with a linear fit in the lower mass uptake region.


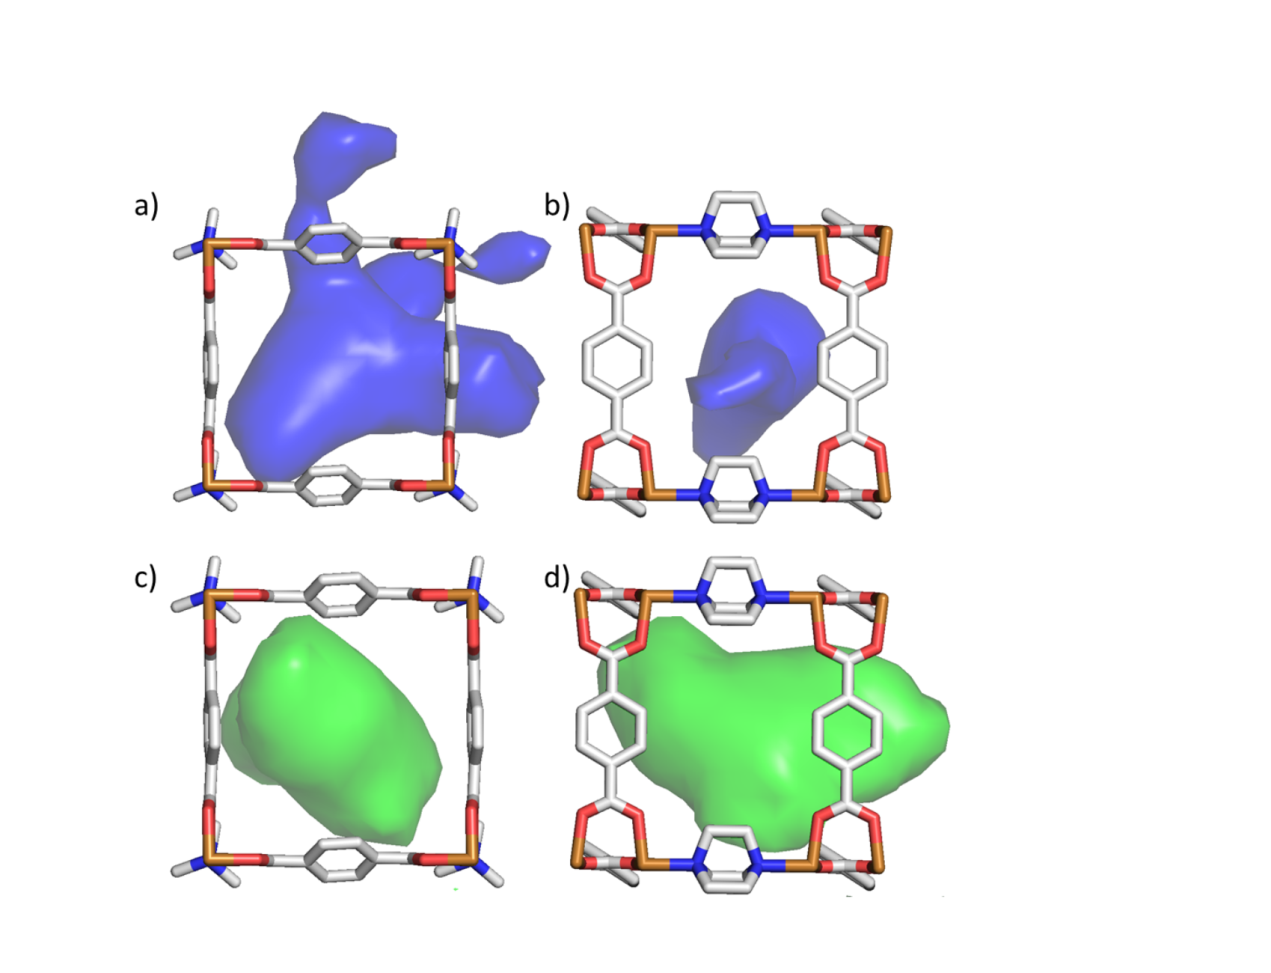


Supplementary Fig. 15| Isosurface plot for density of 2,2 DMB Cu2(bdc)2DABCO MOF a) along [100] and b) [001] plane. Isosurface plot for density of 2,3 DMB in Cu2(bdc)2DABCO MOF, c) along [100] and d) [001] plane


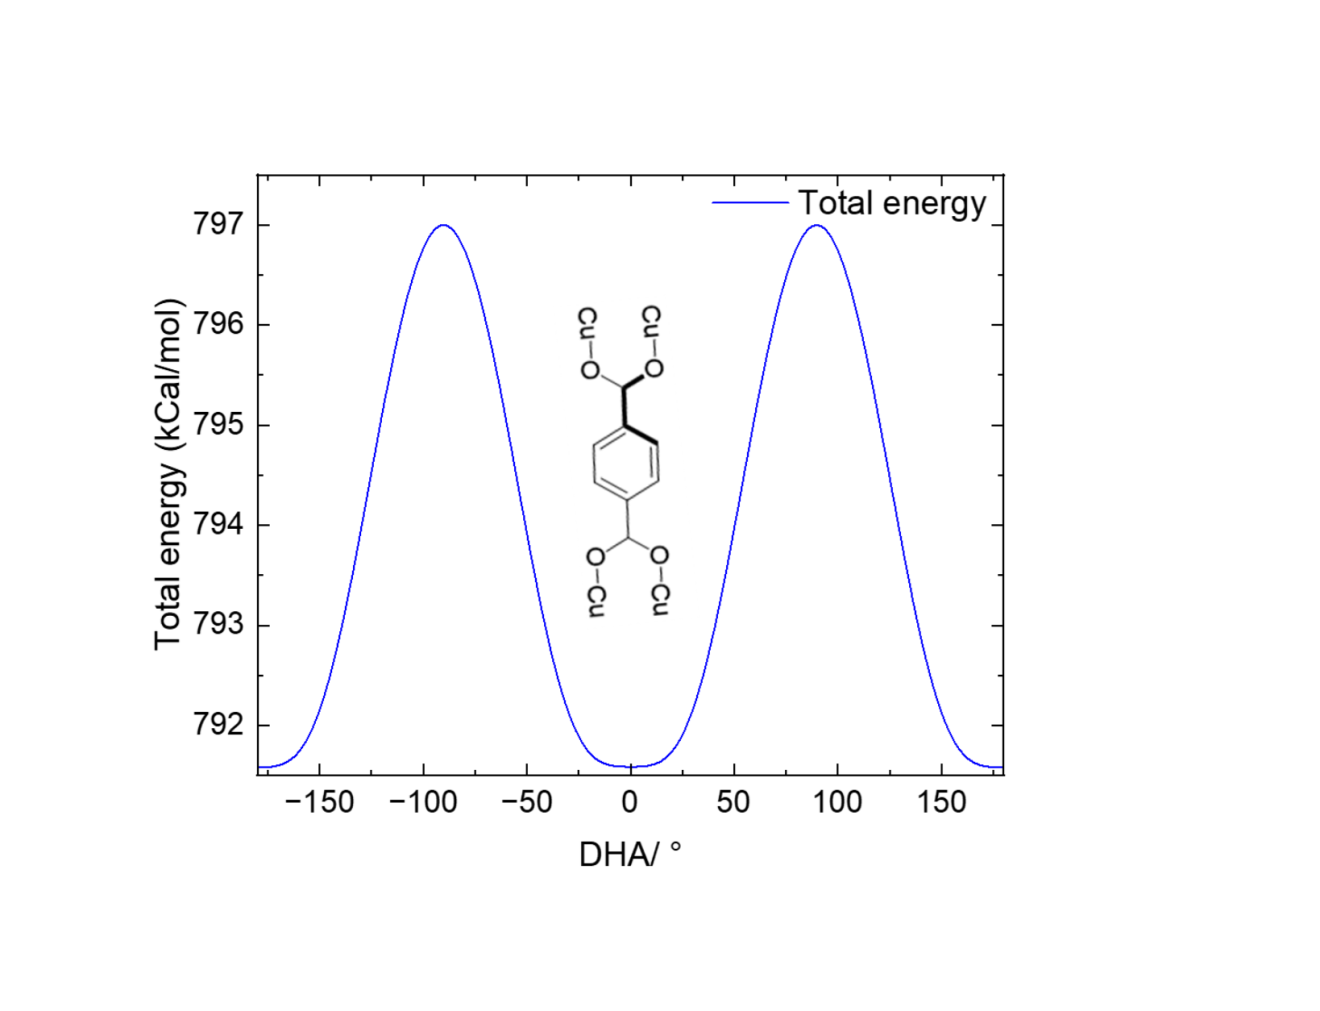


Supplementary Fig. 16| Total Energy plot of dihedral angle (C_bdc-C’_bdc-C_carboxylate-O_carboxylate) for bdc linker calculated using UFF.

Supplementary Fig. 17| DHA changes in response to the presence and absence of isomers in (i-ii) Cu2(bicyclo)2(DABCO) and (iii-iv) Cu2(bdc)2(DABCO). Blue and green line correspond to 2,2-DMB and 2,3 DMB, gray line refers to absence of the isomer, dotted red line indicates DHA in the DFT optimized structure.


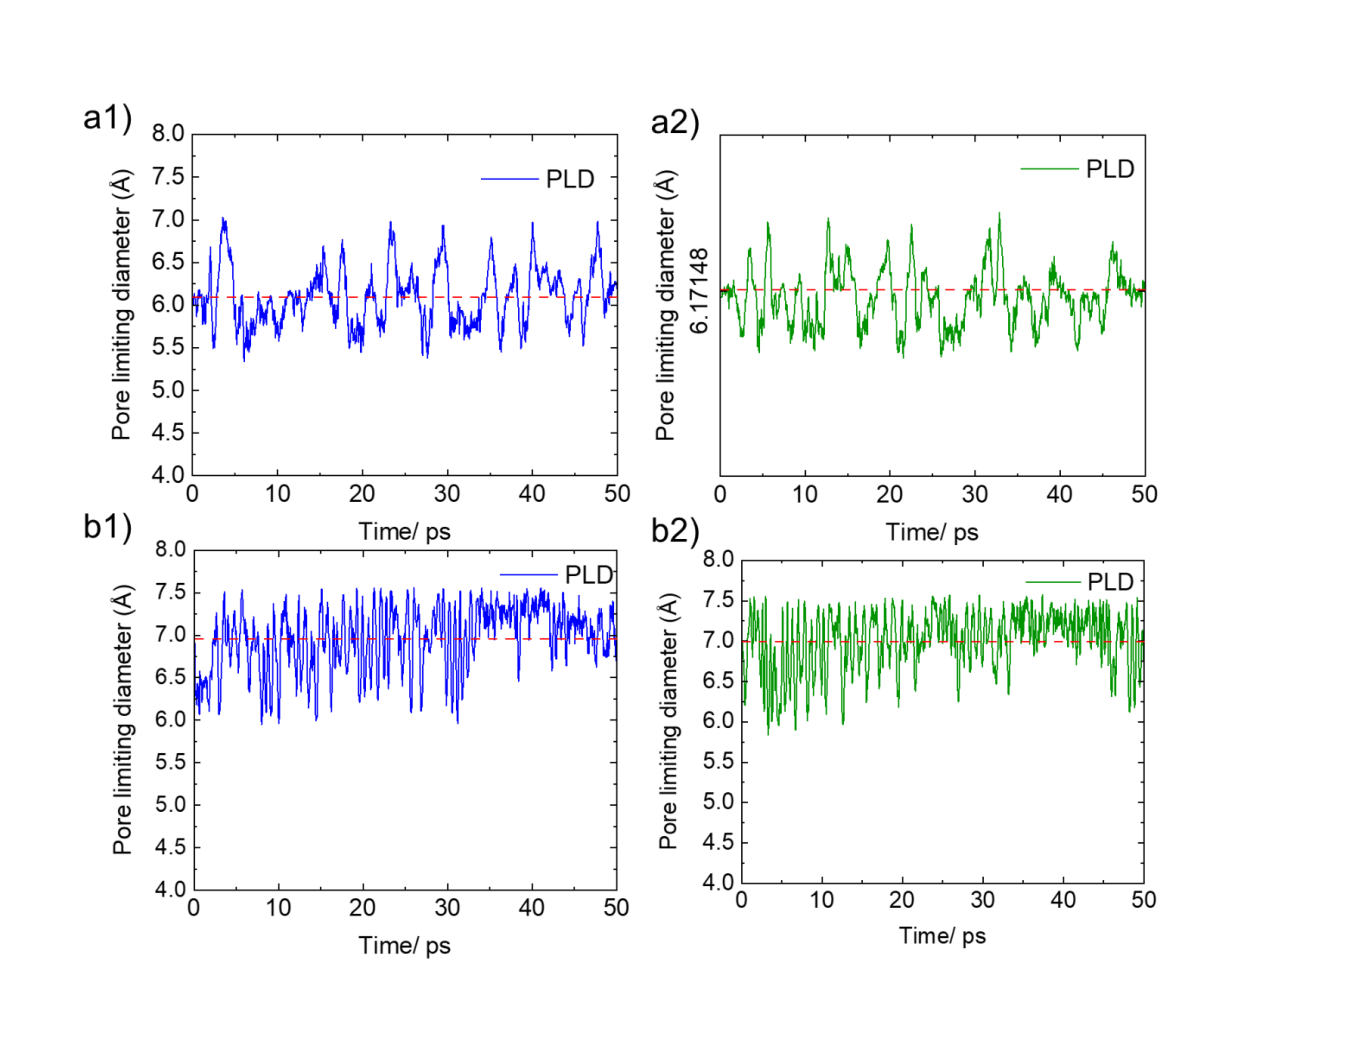


Supplementary Fig. 18| Pore limiting diameter (along [001]) dynamics in presence of 2,2-DMB (blue) and 2,3-DMB (green) in a) Cu2(bicyclo)2(DABCO) and b) Cu2(bdc)2(DABCO).


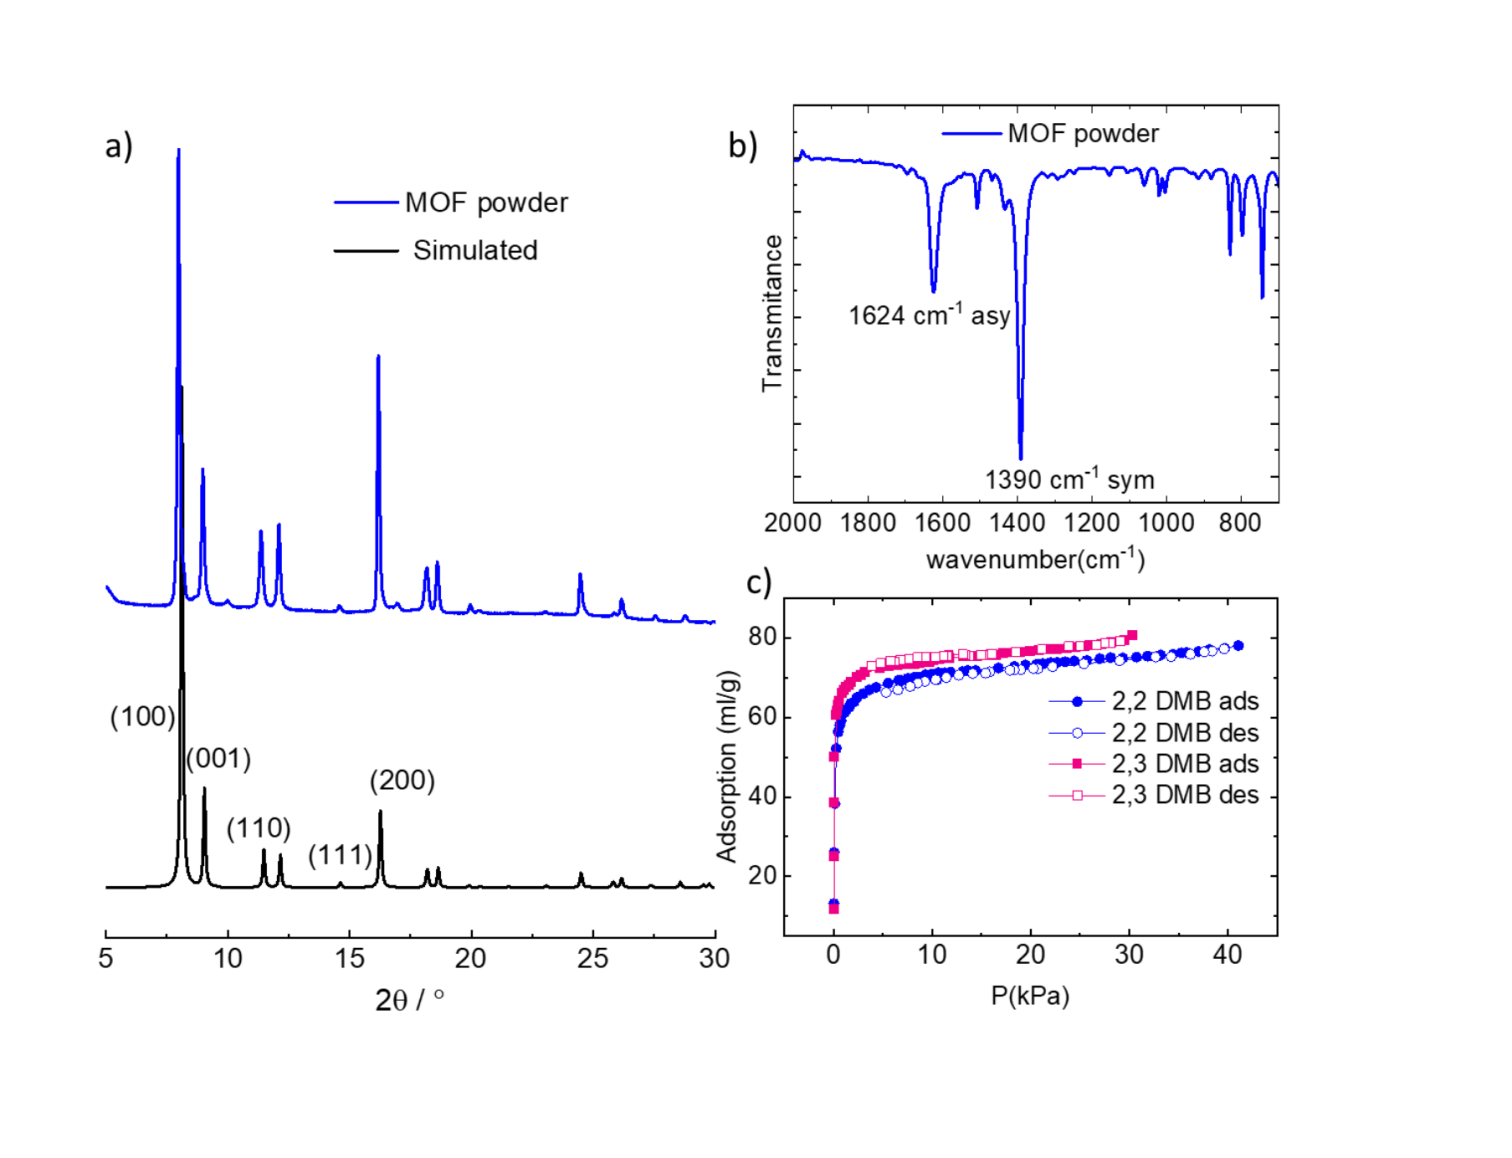


Supplementary Fig.19| a) Powder XRD pattern of Cu2(bdc)2(DABCO) MOF powder compared with the simulated pattern, b) IR spectrum of Cu2(bdc)2(DABCO) MOF powder, c) Adsorption isotherm of 2,2 DMB and 2,3 DMB molecules for the powder Cu2(bdc)2(DABCO).


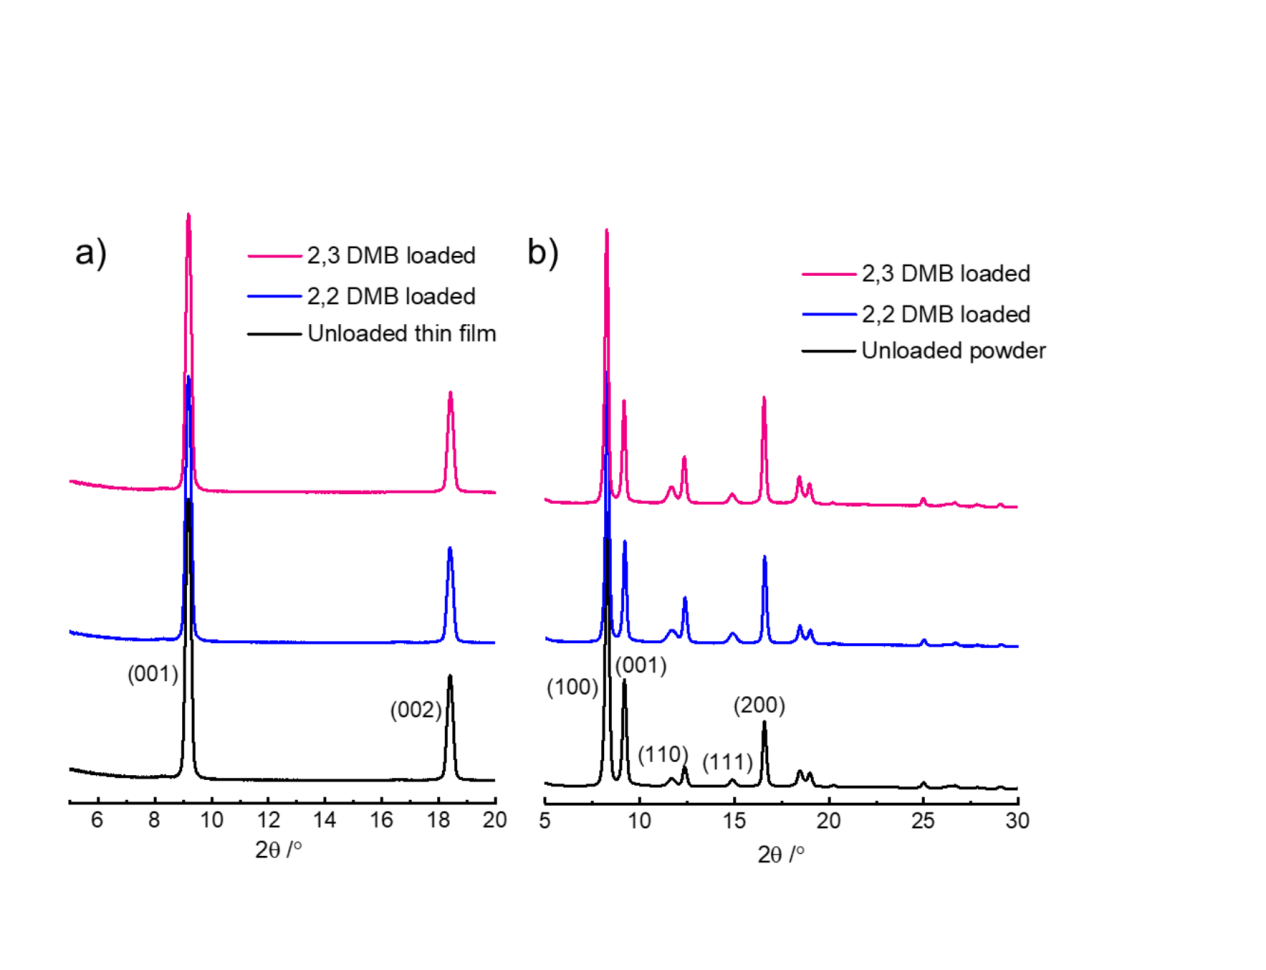


Supplementary Fig. 20| a) X-ray diffraction was studied for Cu2(bicyclo)2(DABCO) thin film loaded with 2,2 DMB (blue) and 2,3 DMB (red) molecules and compared them with the unloaded thin film (black), b) X-ray diffraction was studied for Cu2(bicyclo)2(DABCO) powder loaded with 2,2 DMB (blue) and 2,3 DMB (red) and compared them with unloaded powder MOF(black)


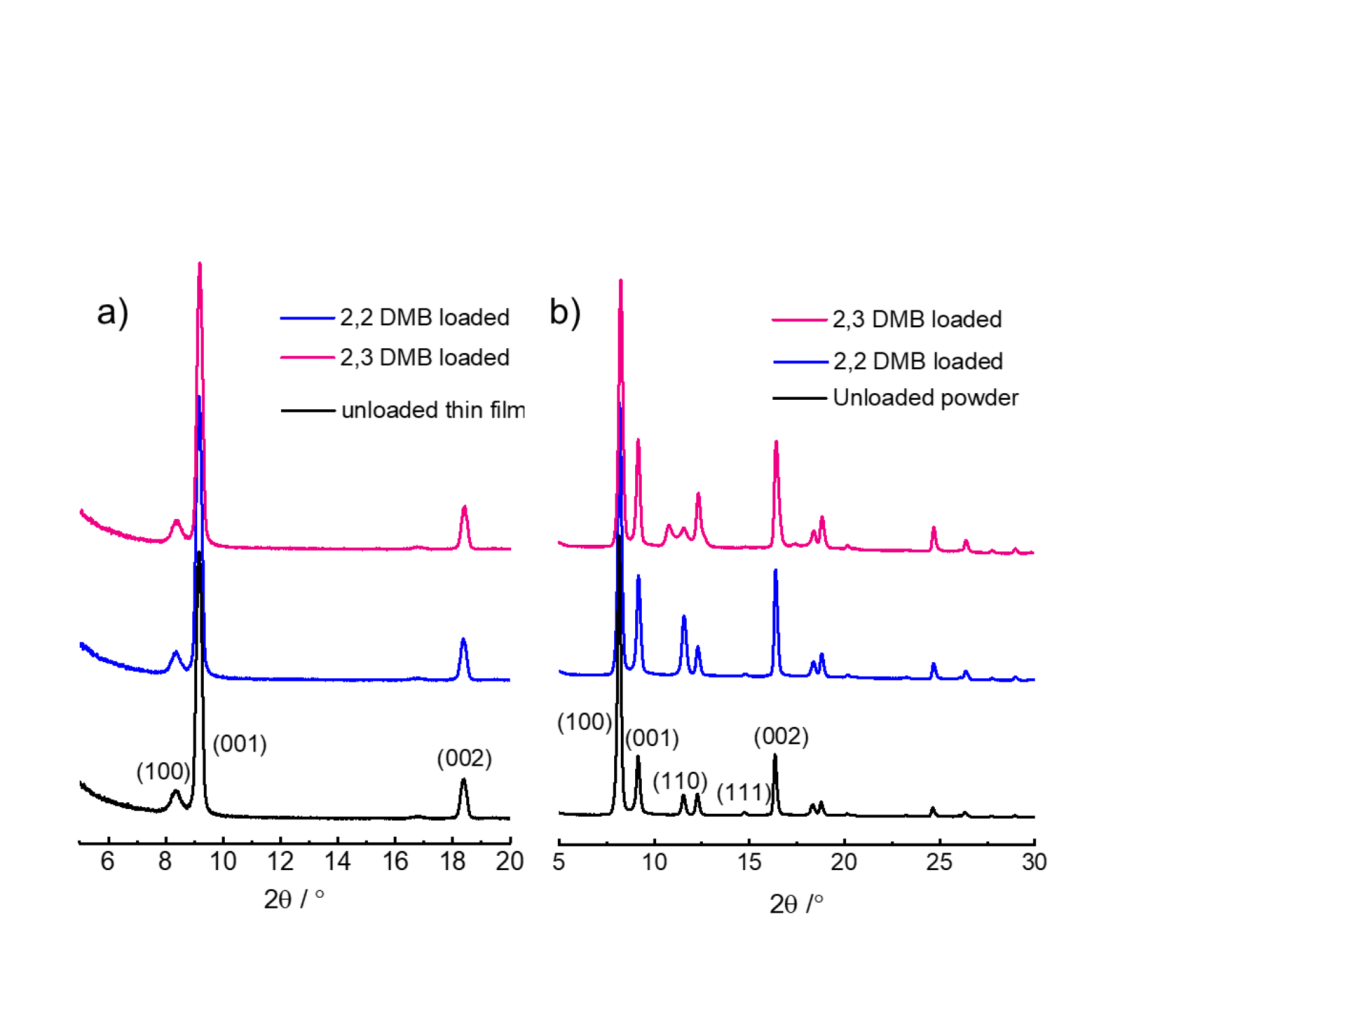


Supplementary Fig. 21| a) X-ray diffraction was studied for Cu2(bdc)2(DABCO) thin film loaded with 2,2 DMB (blue) and 2,3 DMB (red) molecules and compared them with the unloaded thin film (black), b) X-ray diffraction was studied for Cu2(bdc)2(DABCO) powder loaded with 2,2 DMB (blue) and 2,3 DMB (red) and compared with unloaded powder MOF(black)


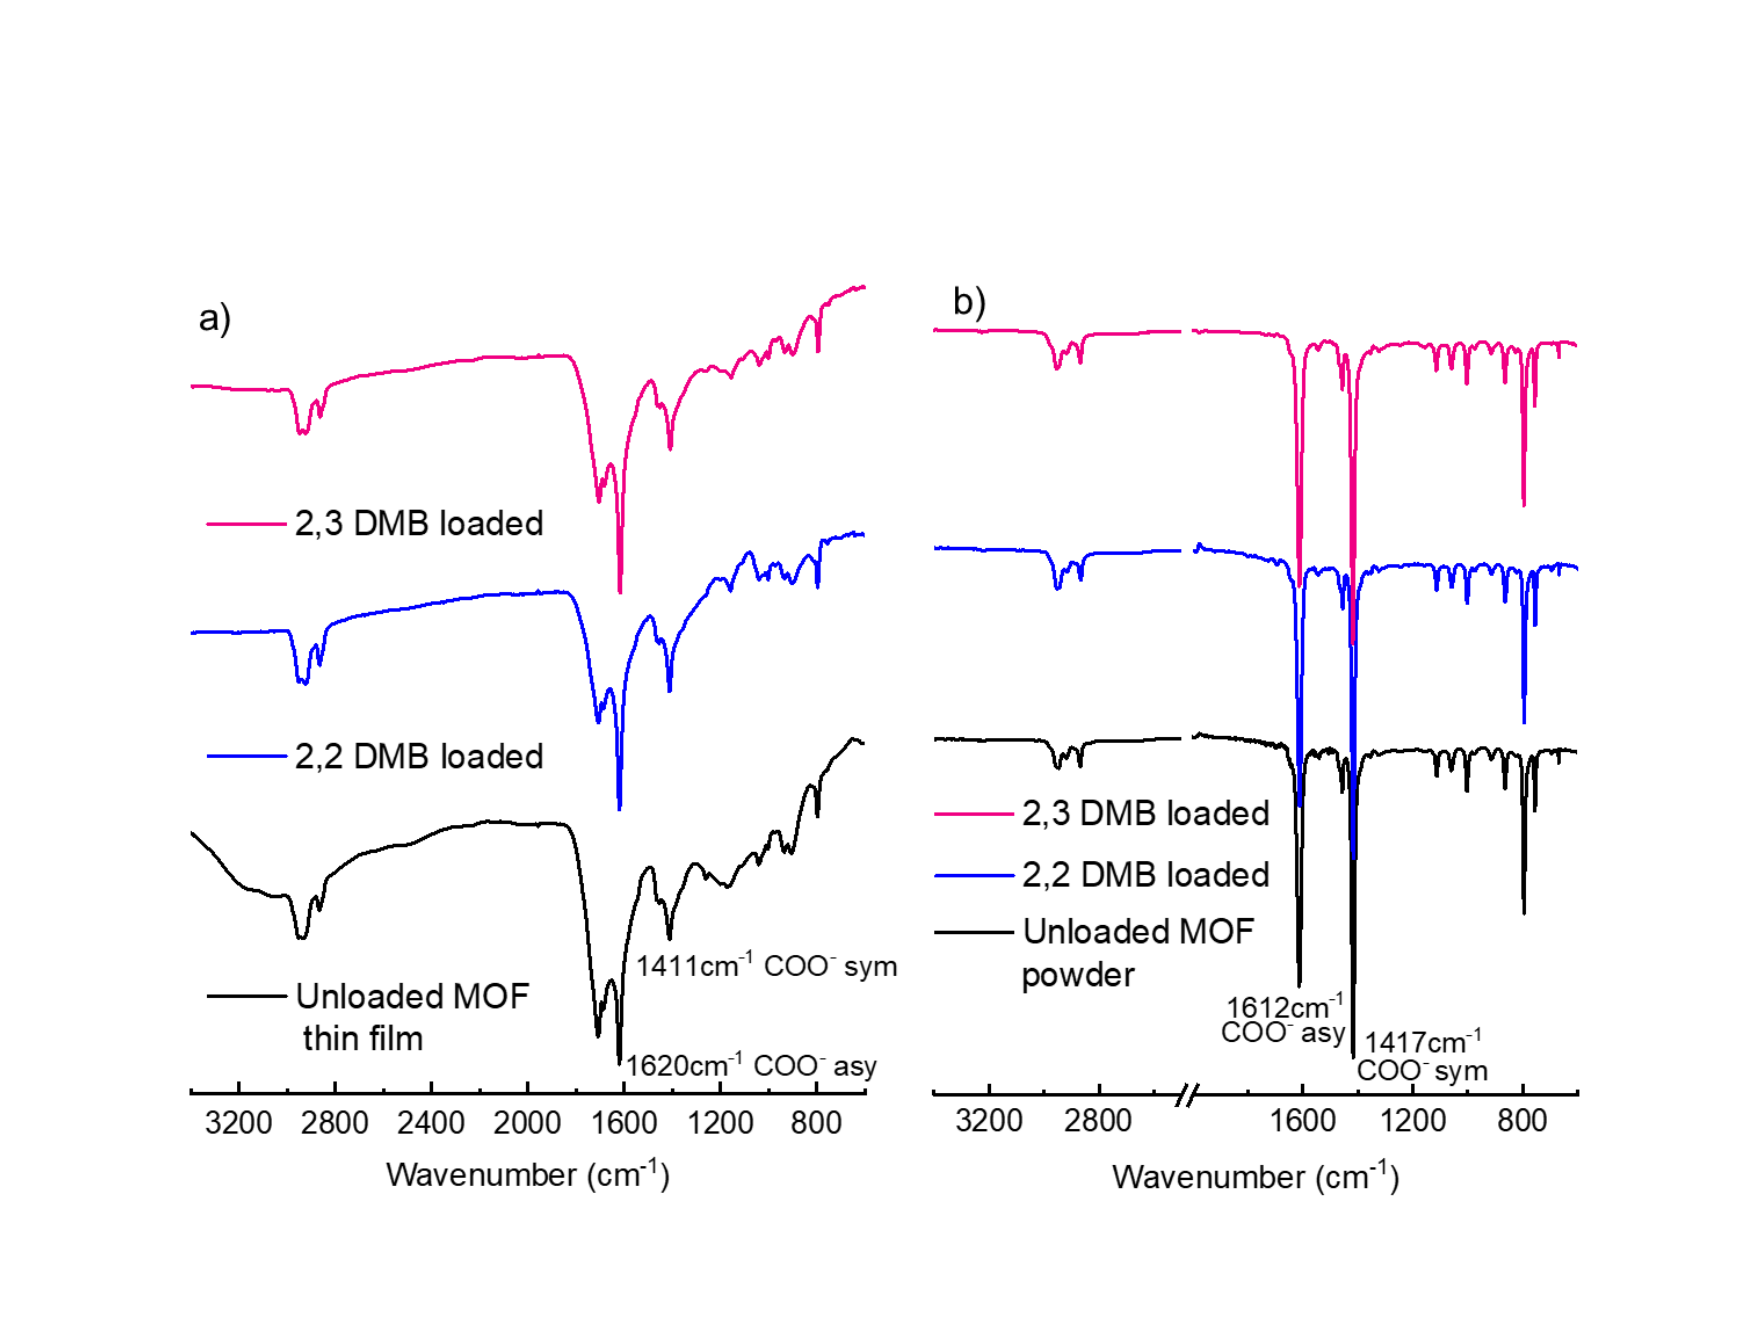


Supplementary Fig. 22| a) IRRA spectra of Cu2(bicyclo)2(DABCO) thin film, unloaded MOF (black); 2,2 DMB loaded (blue); 2,3 DMB loaded (red), b) IR spectrum Cu2(bicyclo)2(DABCO) powder, unloaded MOF (black); 2,2 DMB loaded (blue); 2,3 DMB loaded (red)


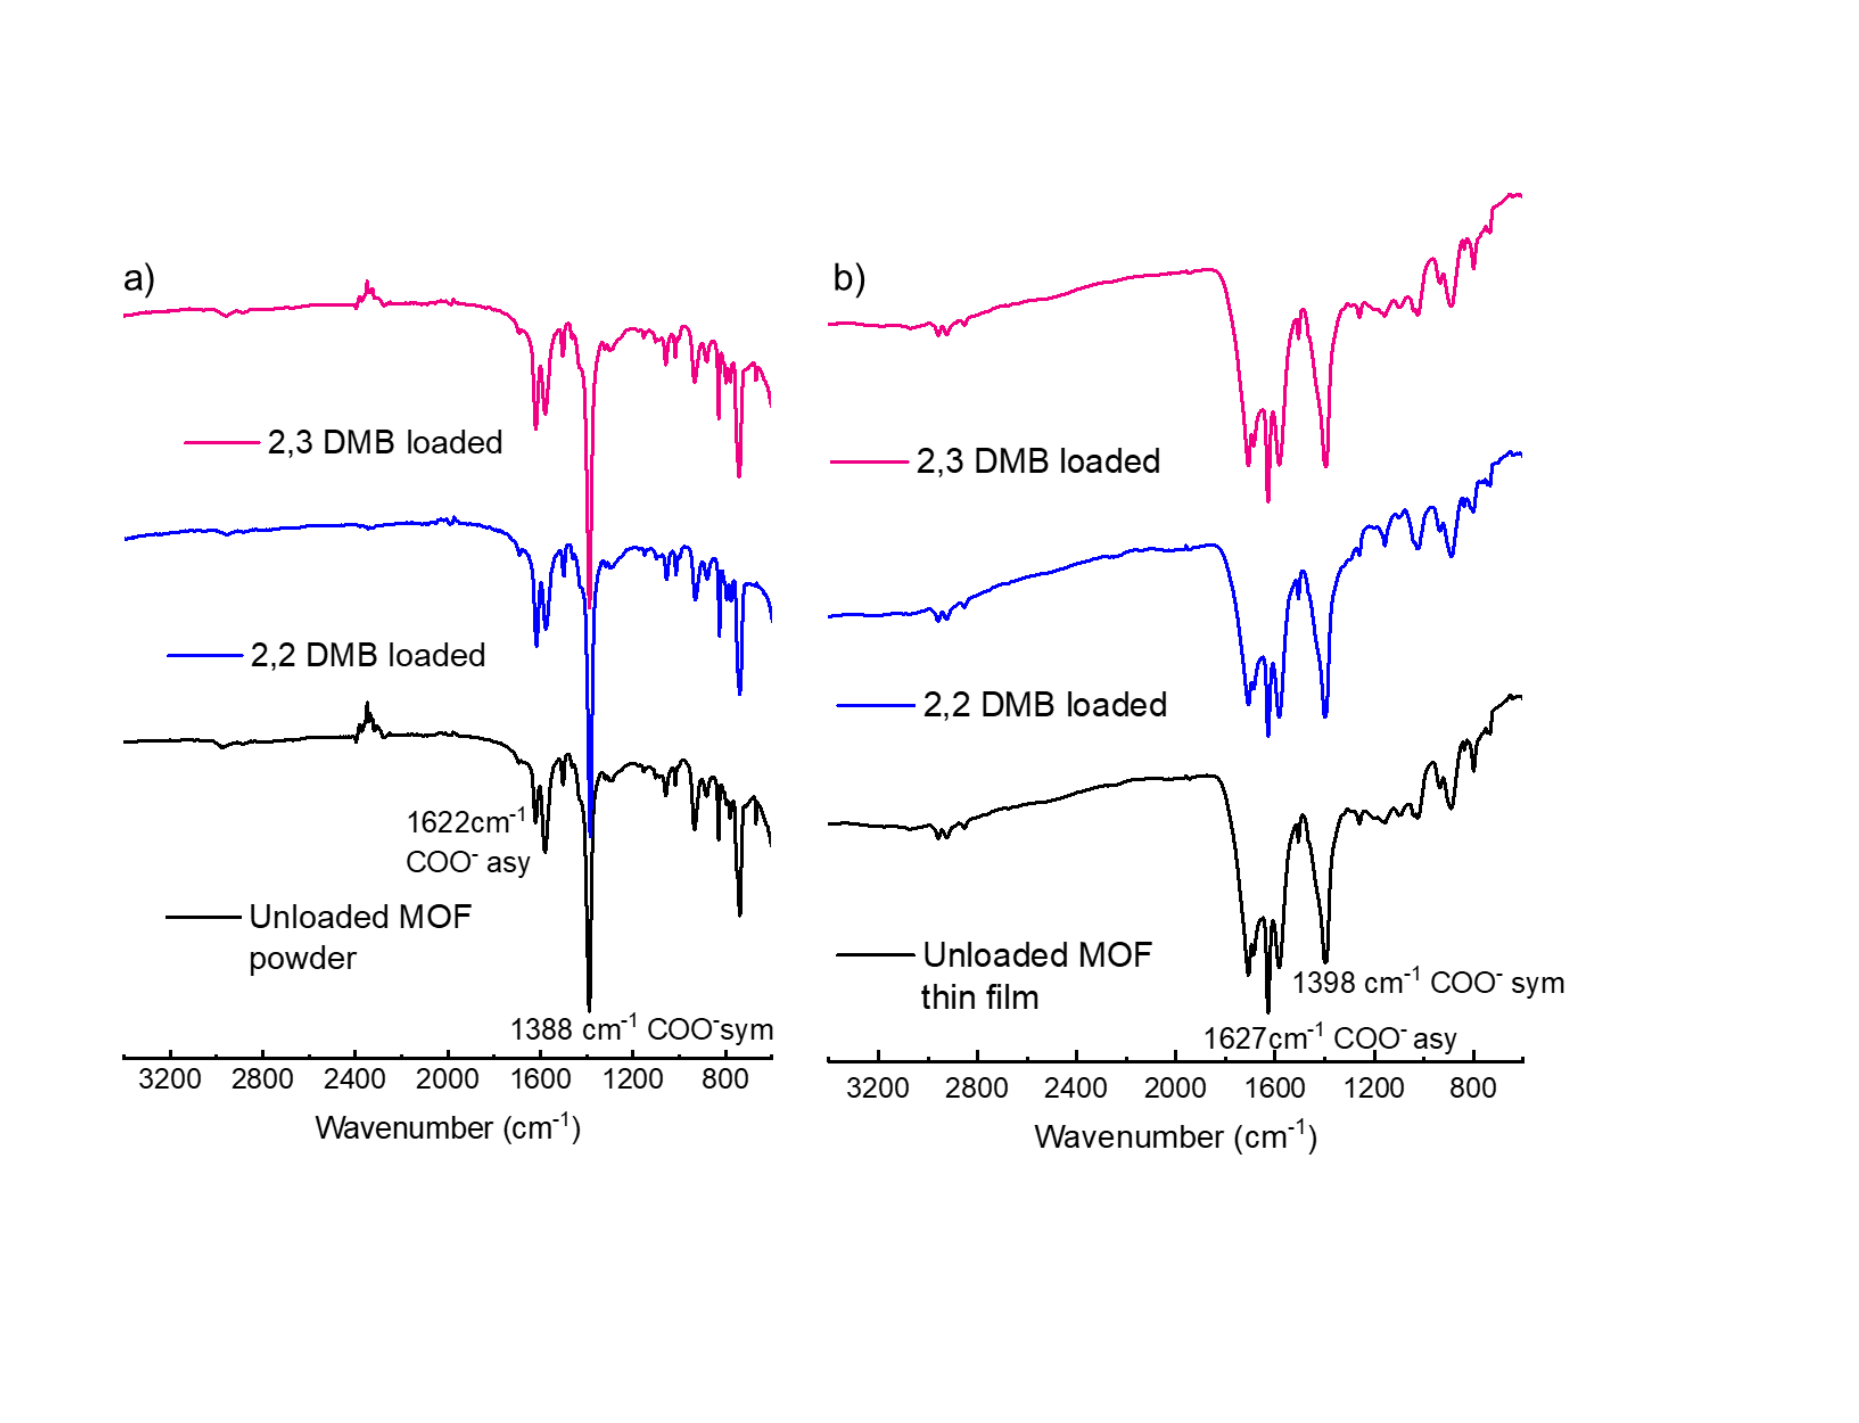


Supplementary Fig. 23| a) IRRA spectra of Cu2(bdc)2(DABCO) thin film, unloaded MOF (black); 2,2 DMB loaded (blue); 2,3 DMB loaded (red); b) IR spectrum Cu2(bdc)2(DABCO) powder, unloaded MOF (black); 2,2 DMB loaded (blue); 2,3 DMB loaded (red)


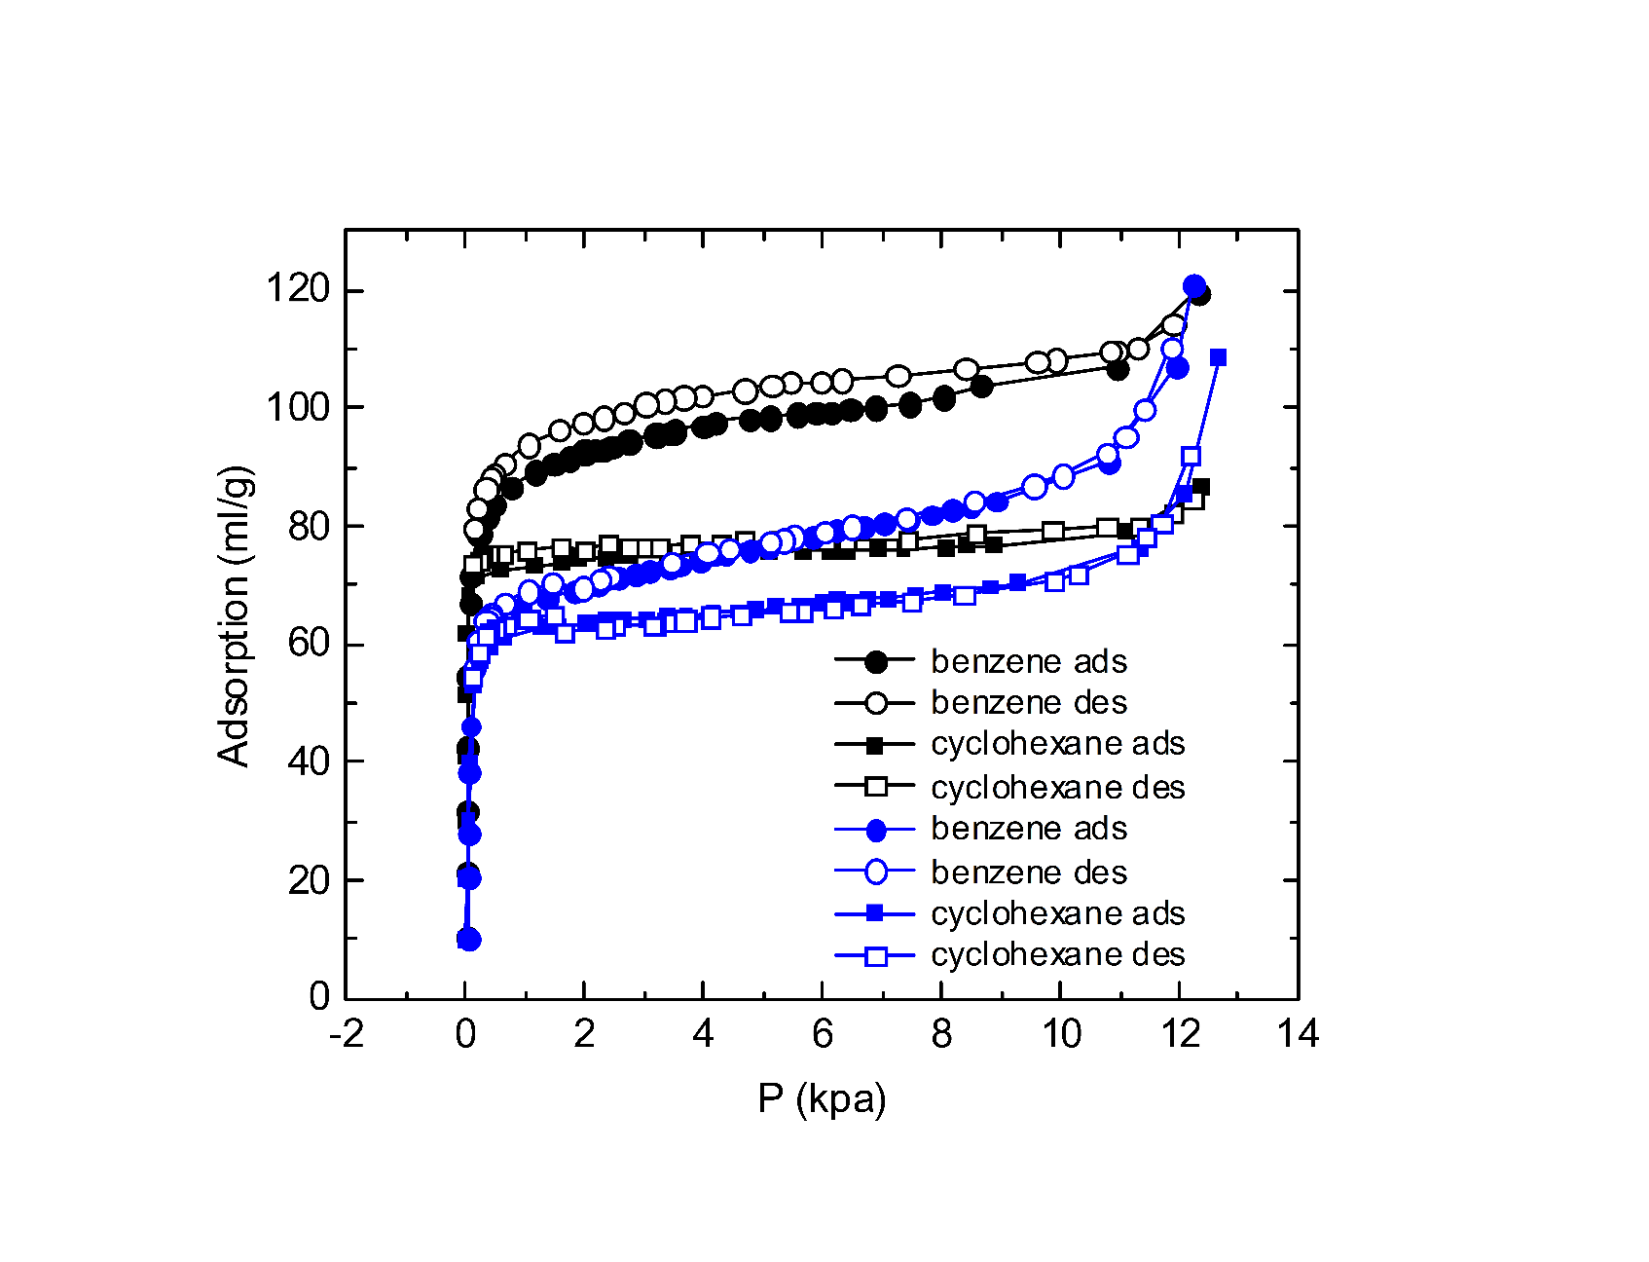


Supplementary Fig. 24| Adsorption isotherm of Cu2(bdc)2(DABCO) MOF powder for benzene and cyclohexane. Benzene adsorption: black filled circle, desorption: black empty circle. Cyclohexane adsorption: black filled square, desorption: black empty square. Adsorption isotherm of Cu2(bicyclo)2(DABCO) MOF powder for benzene and cyclohexane. Benzene adsorption: blue filled circle, desorption: blue empty circle. Cyclohexane adsorption: blue filled square, desorption: blue empty square.


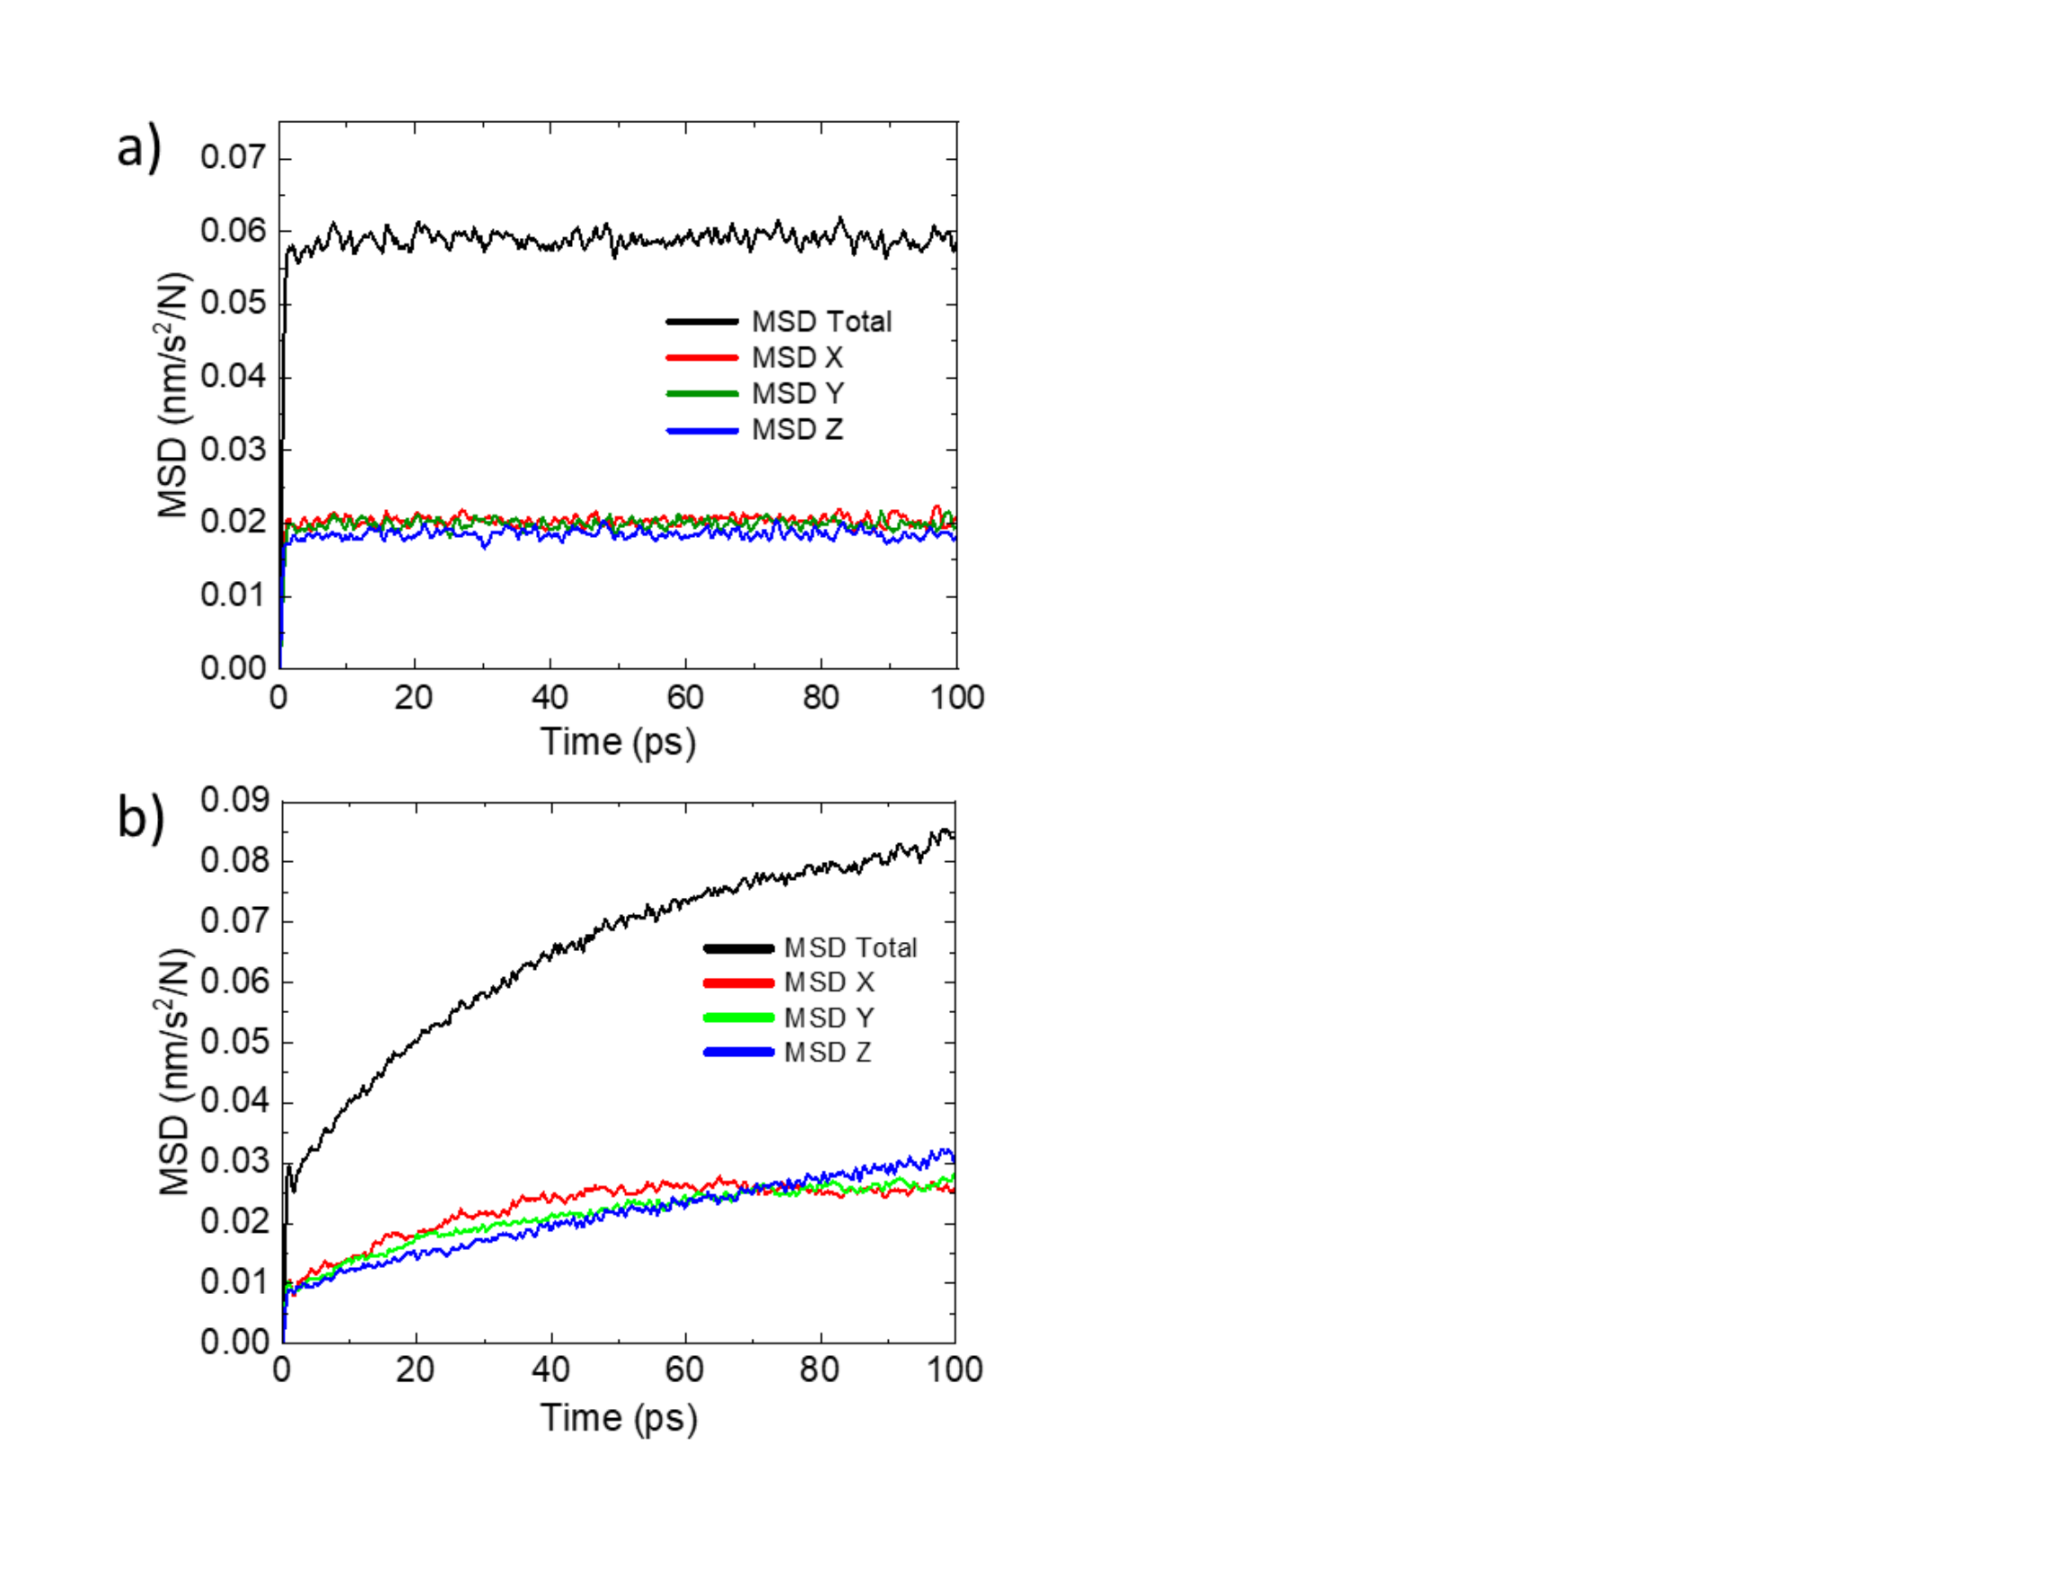


Supplementary Fig. 25| MSD for benzene in a) Cu2(bicyclo)2DABCO and b) Cu2(bdc)2DABCO along [010],[100] and [001] planes and respective mean.


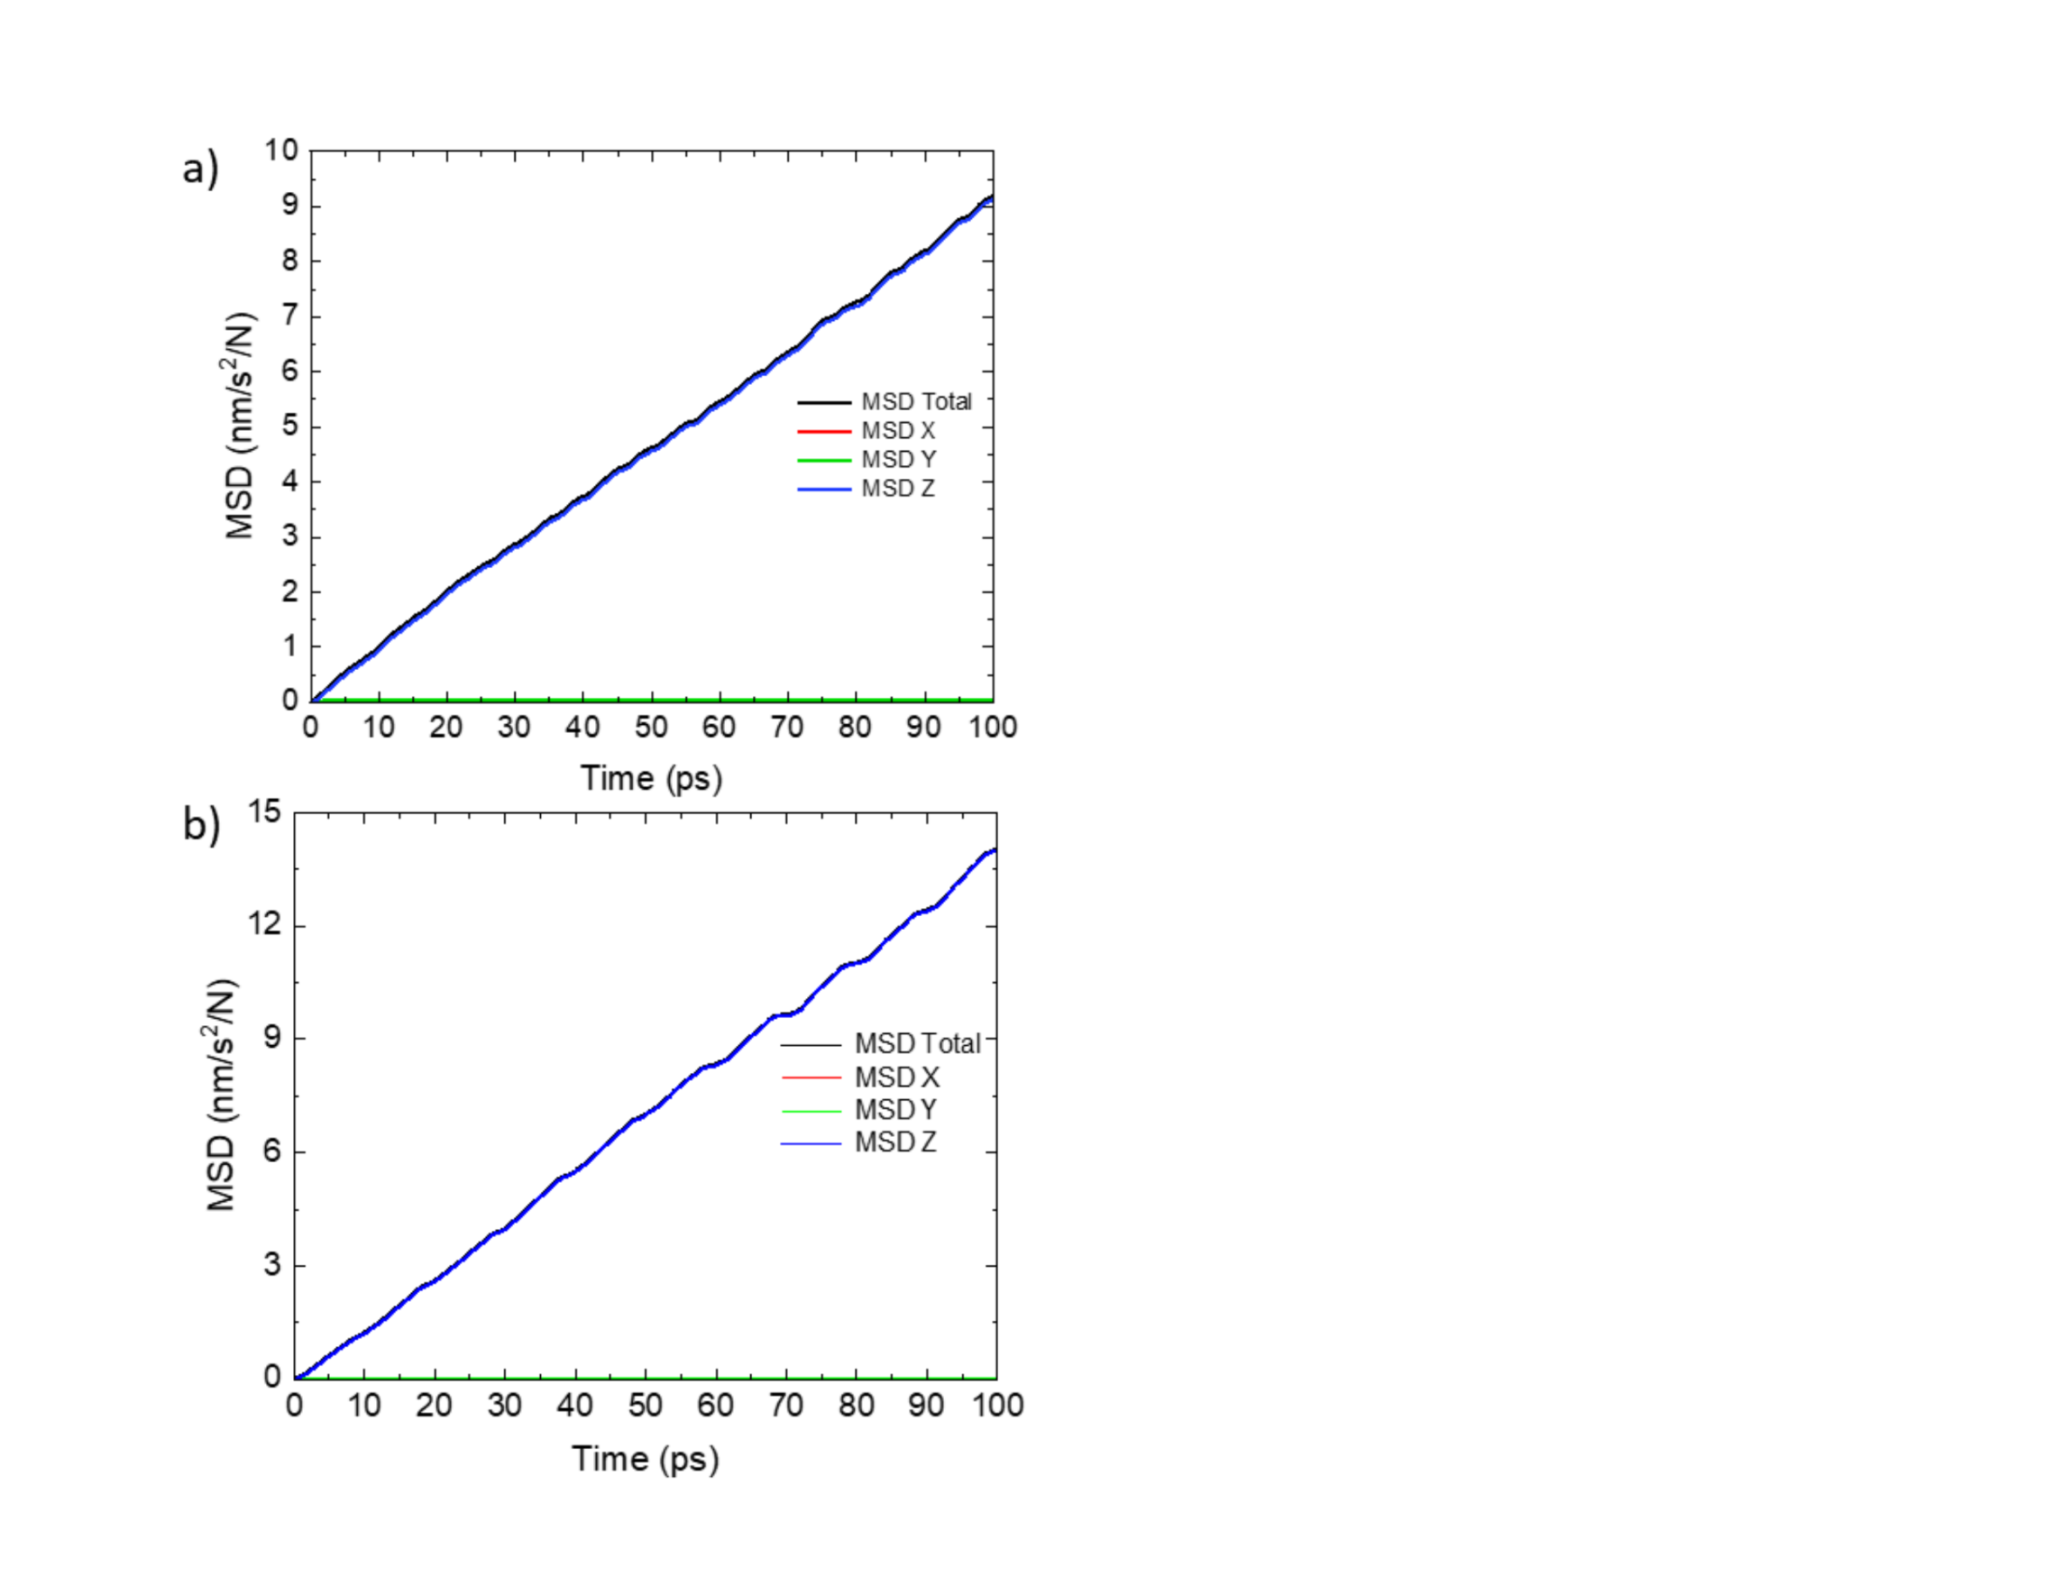


Supplementary Fig. 26| MSD for cyclohexane in a) Cu2(bicyclo)2DABCO and b) Cu2(bdc)2DABCO along [010],[100] and [001] planes and respective mean.


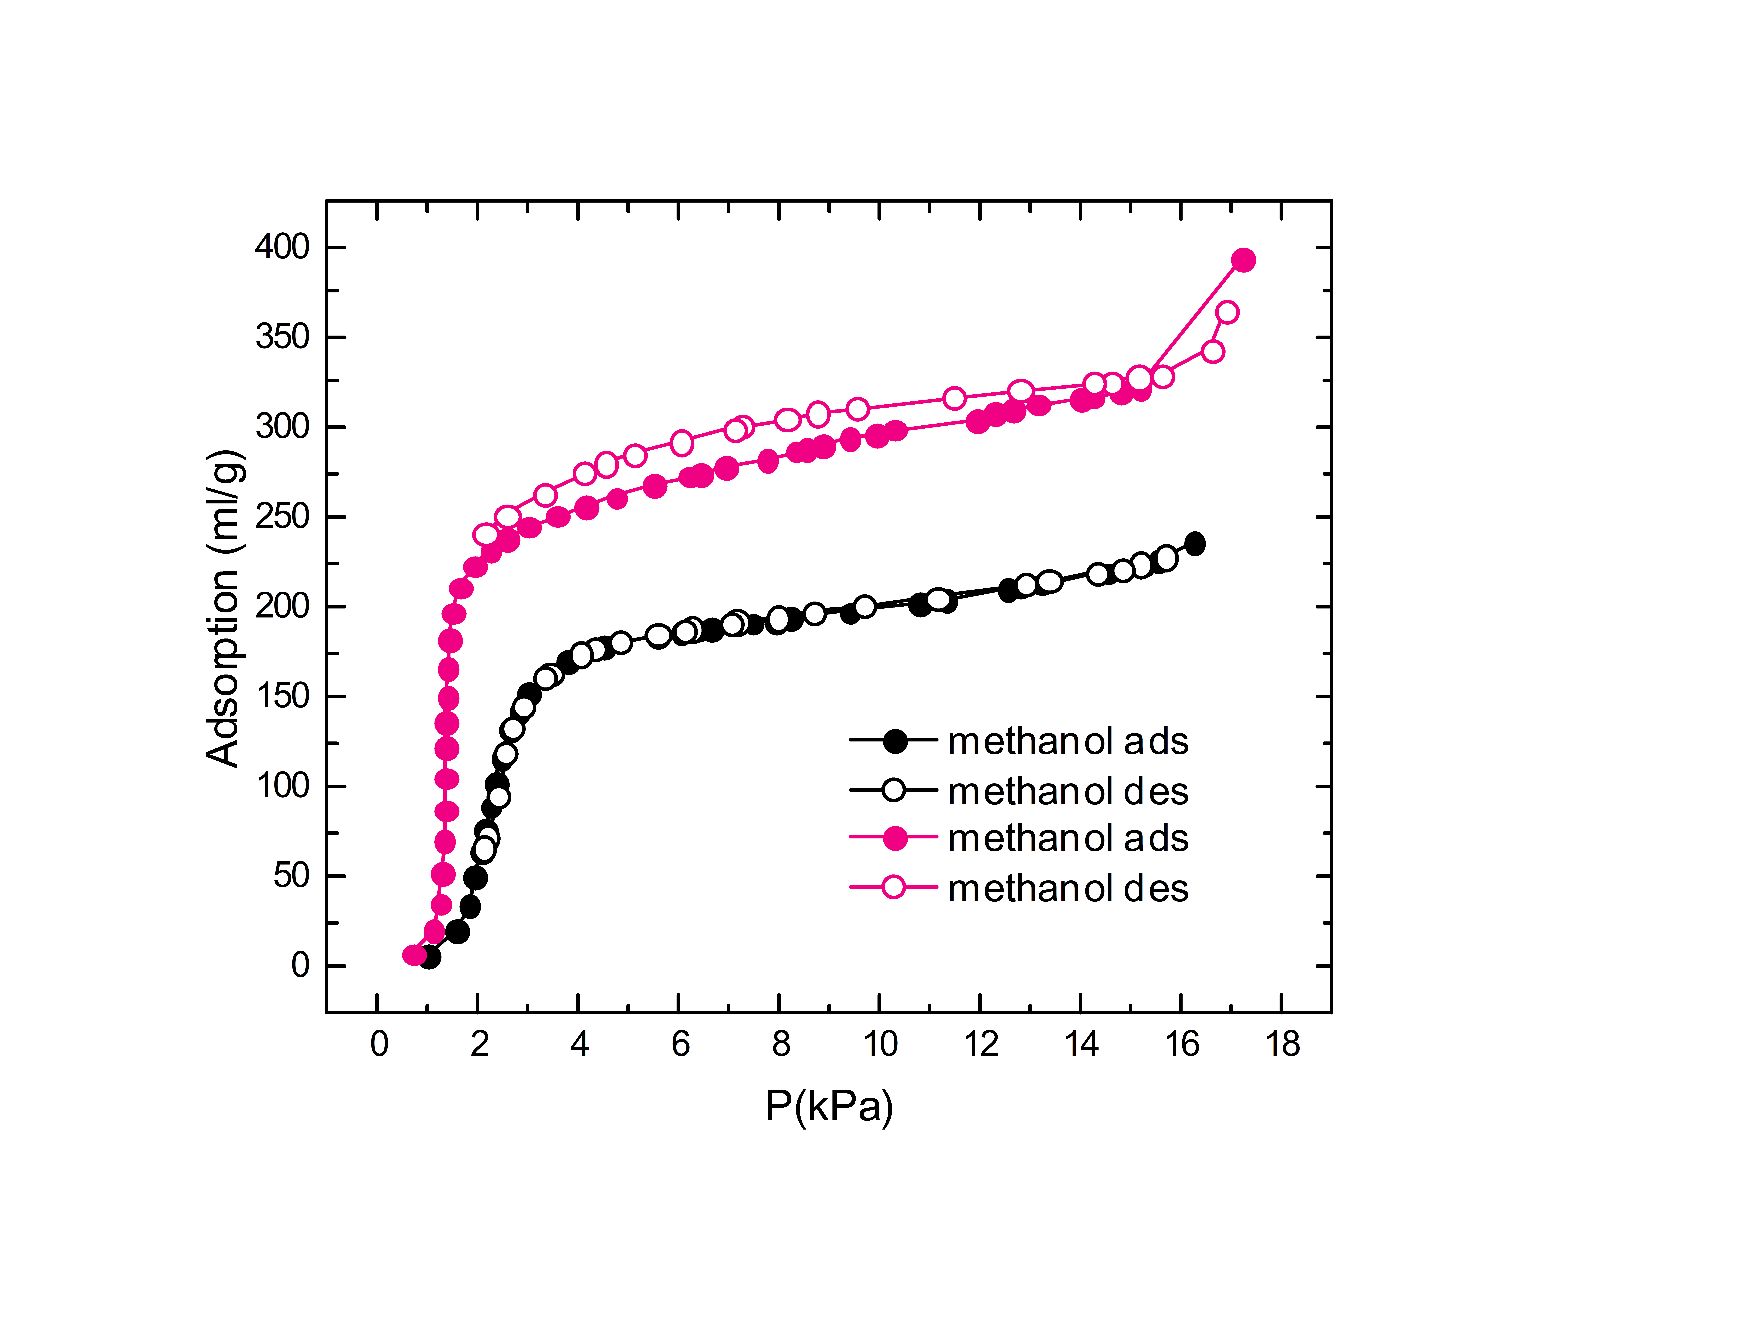


Supplementary Fig. 27: Methanol adsorption isotherm for Cu2(bdc)2(DABCO) (red fill circle = adsorption, red empty circle = desorption) and Cu2(bicycle)2(DABCO) MOF powder (black fill circle = adsorption, black empty circle = desorption).

Supplementary Fig. 28| a) Comparison of mass uptake profile for Cu2(bicyclo)2(DABCO) and Cu2(bdc)2(DABCO) thin film on QCM sensor. For Cu2(bicyclo)2(DABCO), blue solid circle: 2,2 DMB, blue empty circle: 2,3 DMB. For Cu2(bdc)2(DABCO), black solid square: 2,2 DMB and black empty square: 2,3 DMB, b) Comparison of MSD (in Z direction) of 2,2 DMB molecule for the Cu2(bicyclo)2(DABCO) and Cu2(bdc)2(DABCO) MOFs.


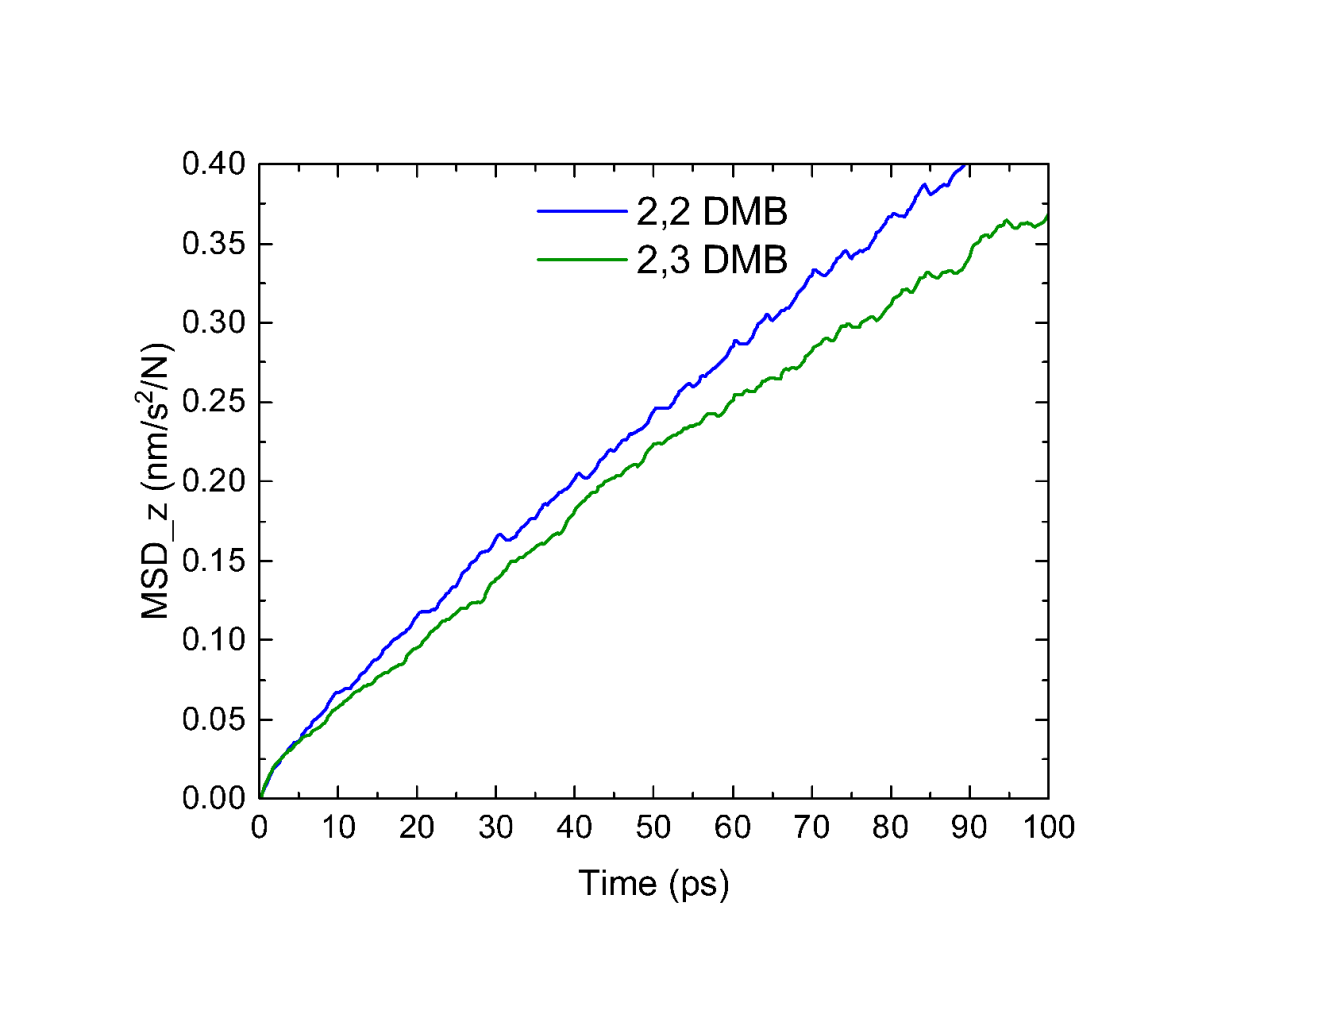


Supplementary Fig. 29| MSD of 2,2 DMB and 2,3 DMB in Cu2(bicyclo)(bdc)(DABCO) along [001].


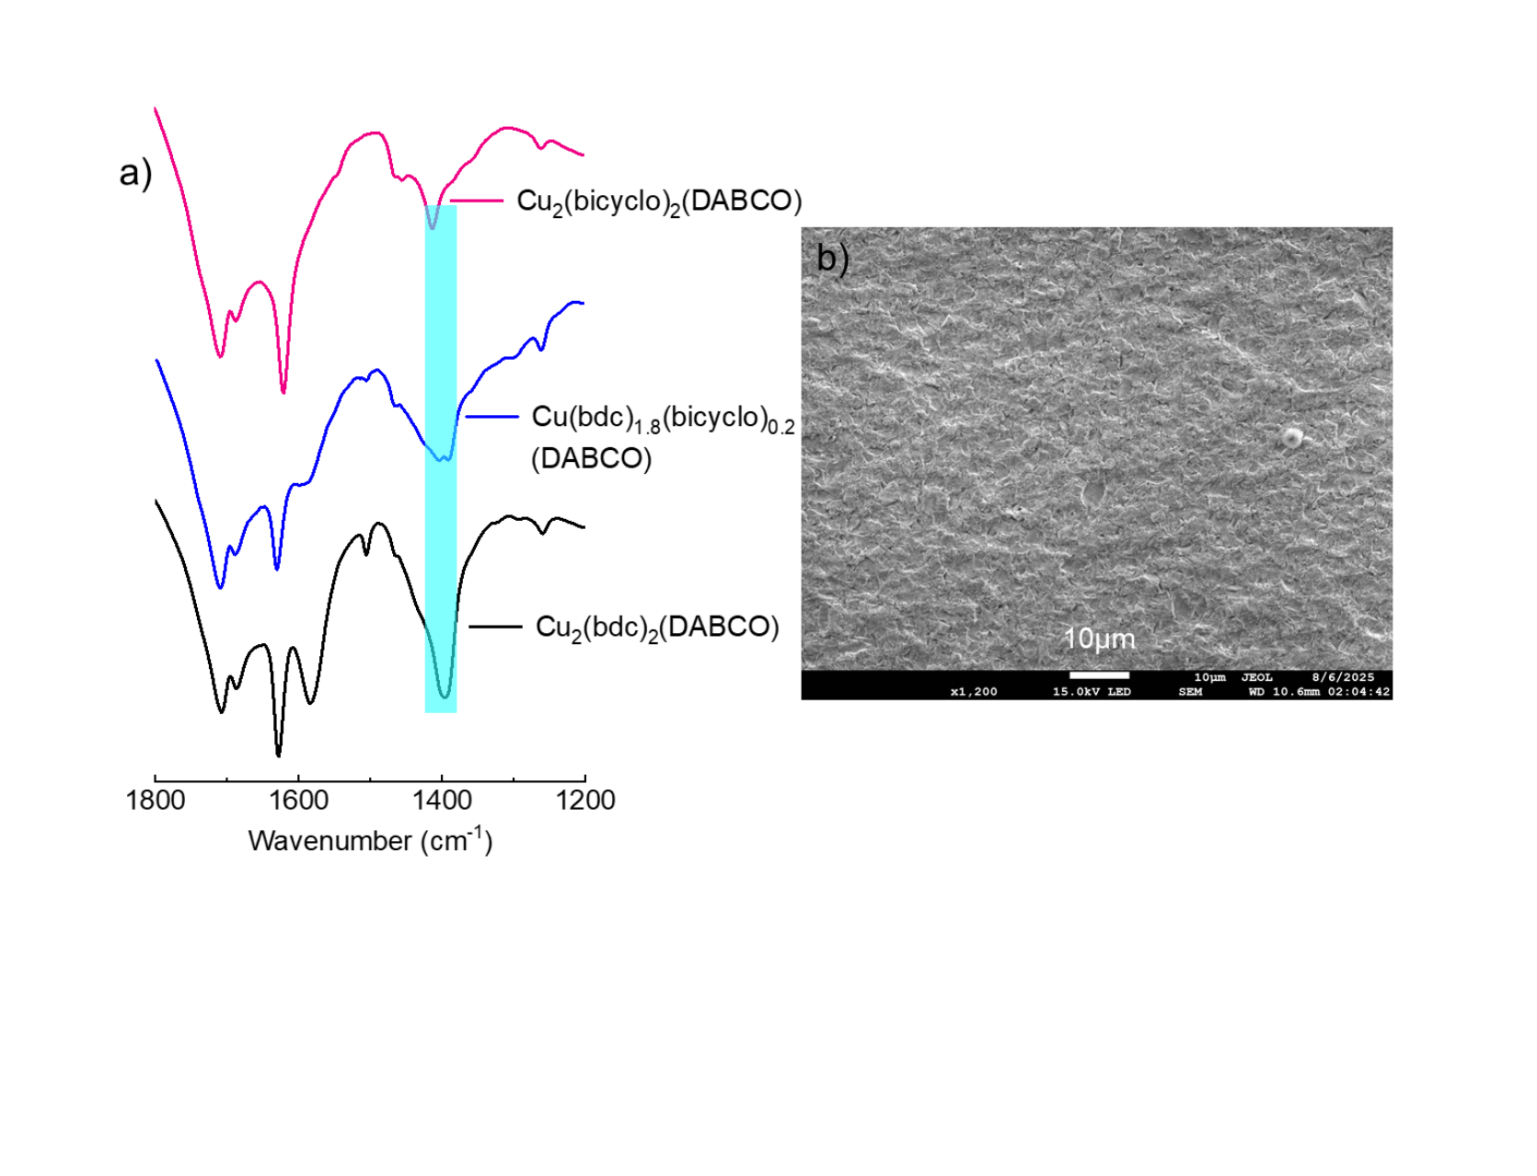


Supplementary Fig. 30| a) IRRA spectra of Cu2(bicyclo)2(DABCO), Cu2(bdc)2(DABCO) and Cu2(bdc)1.8(bicyclo)0.2(DABCO) thin films, b) SEM image of Cu2(bdc)1.8(bicyclo)0.2(DABCO) thin film.


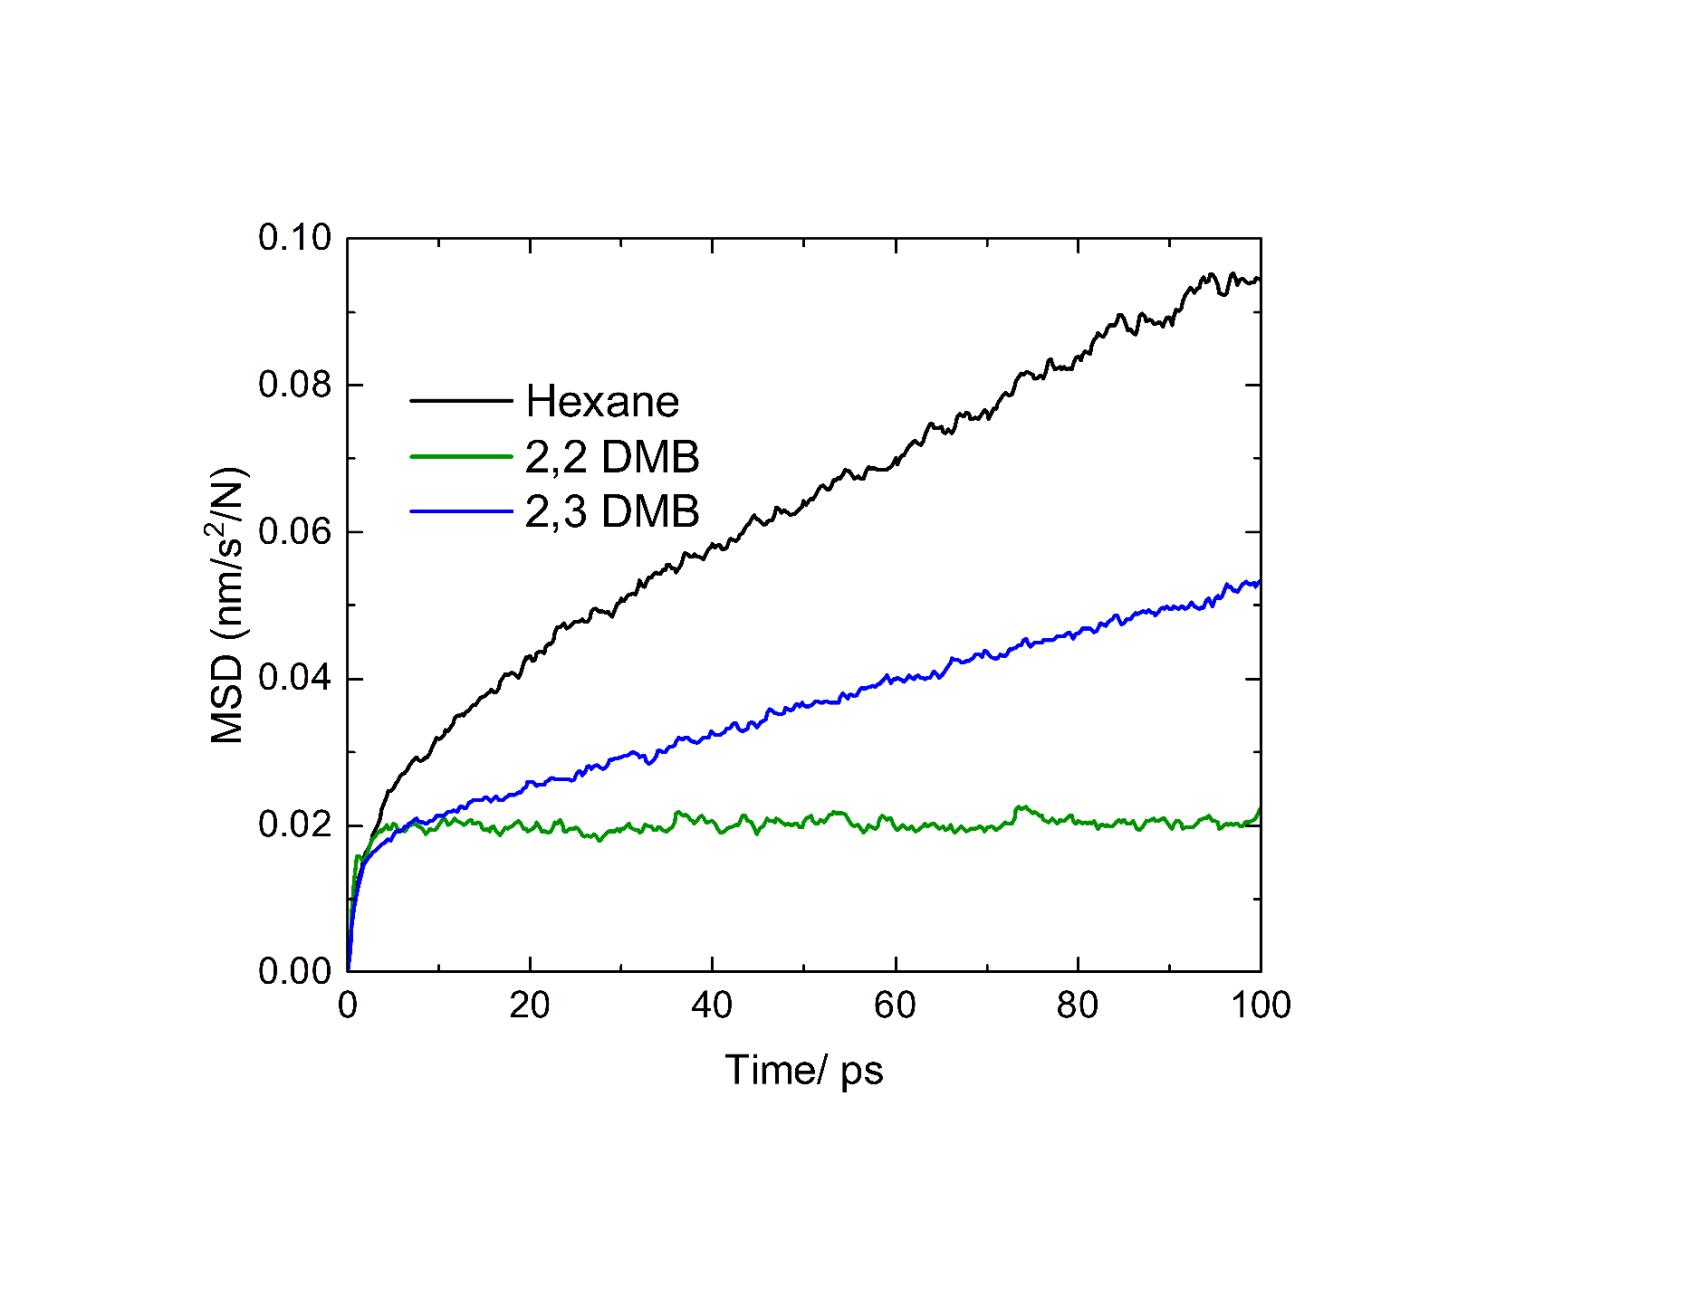


Supplementary Fig. 31| MSD of n-hexane, 2,2 DMB and 2,3 DMB in Cu2(bicyclo)2(DABCO).
